# Supplementary material for: Hsp47 promotes biogenesis of multi-subunit neuroreceptors in the endoplasmic reticulum
Source: eLife journal article supplement (doi:10.7554/elife.84798), 2024-07-04

Figure 3

Figure 3A Top panel  
IB:  $\alpha 1$

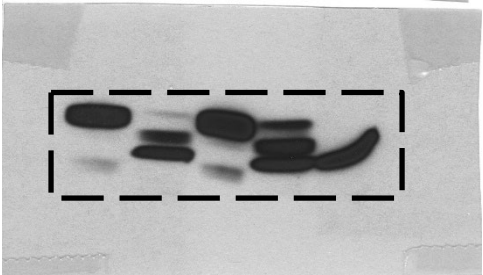

Figure 3A Bottom panel  
IB:  $\beta$ -actin

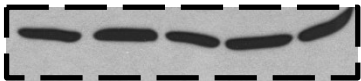

Figure 3B

Top left panel  
IB:  $\alpha 1$

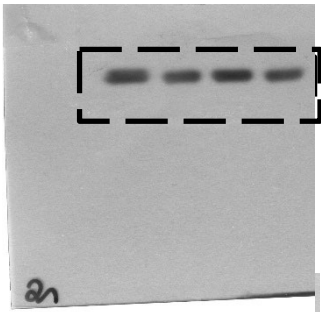

Figure 3B Bottom left panel  
IB: Hsp47

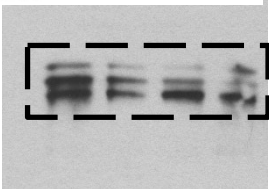

Figure 3B

Top right panel  
IB:  $\alpha 1$

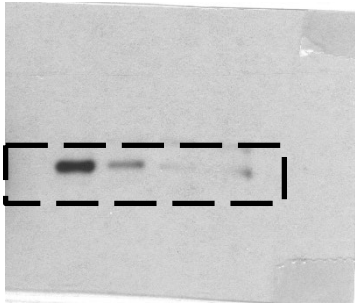

Figure 3B Bottom right panel  
IB: Hsp47

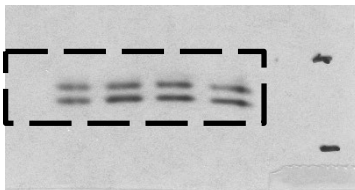

Figure 3C

Top left panel  
IB:  $\alpha 1$

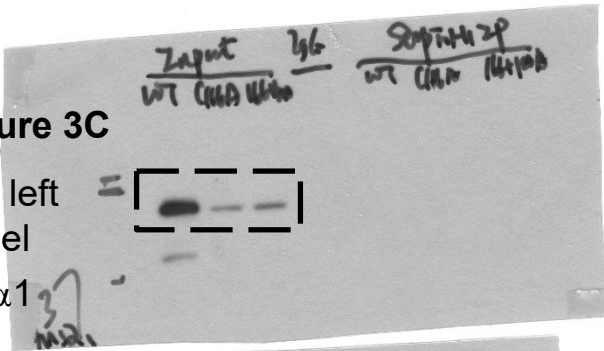

Figure 3C

Bottom left panel  
IB: Hsp47

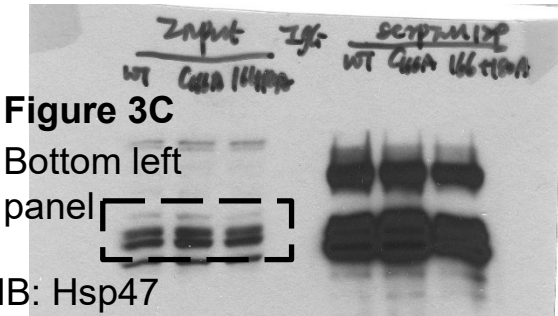

Figure 3C Top right panel  
IB:  $\alpha 1$

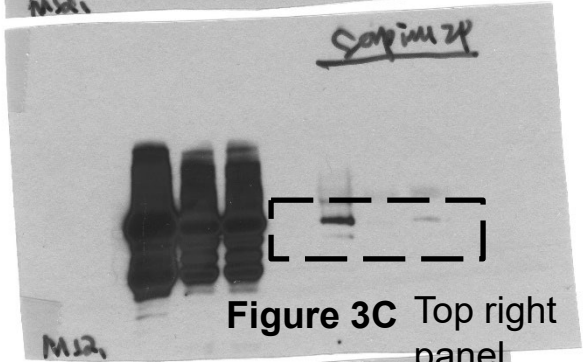

Figure 3C

Bottom right panel  
IB: Hsp47

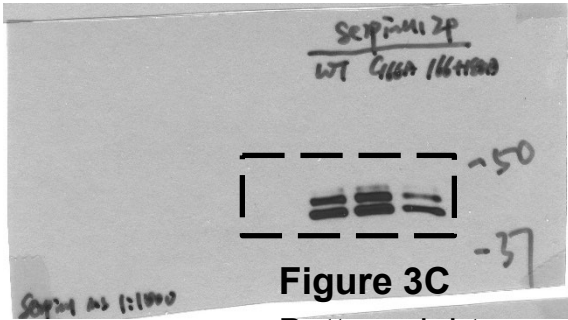

Figure 3

Figure 3D

Top left  
panel  
IB: α1

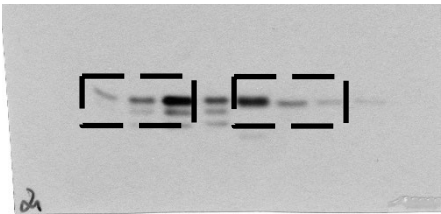

Top right  
panel  
IB: α1

Figure 3D

Figure 3D

Bottom left  
panel  
IB: β-actin

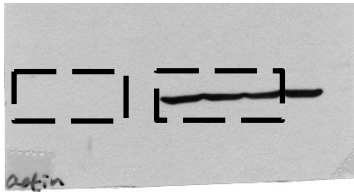

Bottom right  
panel  
IB: β-actin

Figure 3D

Figure 3E

Top left  
panel  
IB: BiP

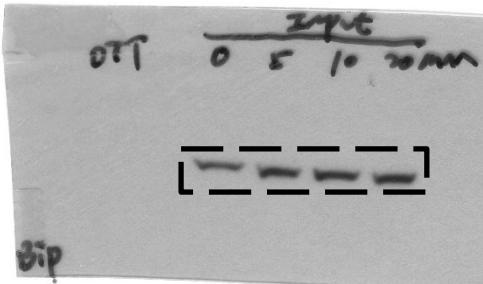

Figure 3E

Top right  
panel  
IB: BiP

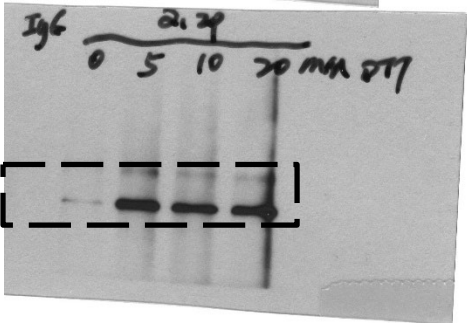

Figure 3E

Bottom left  
panel  
IB: α1

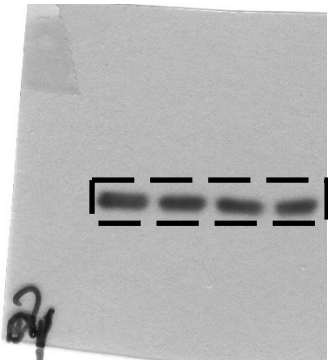

Figure 3E

Bottom right  
panel  
IB: α1

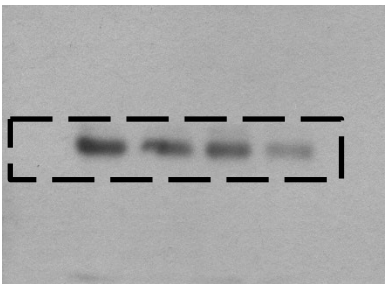

Figure 3F

Top left  
panel  
IB: BiP

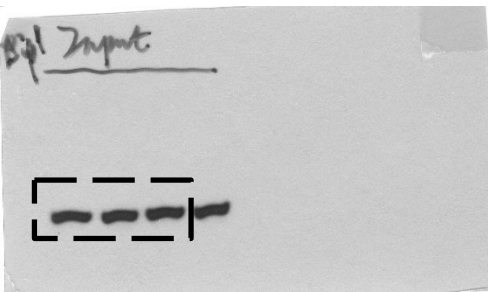

Figure 3F

Top right  
panel  
IB: BiP

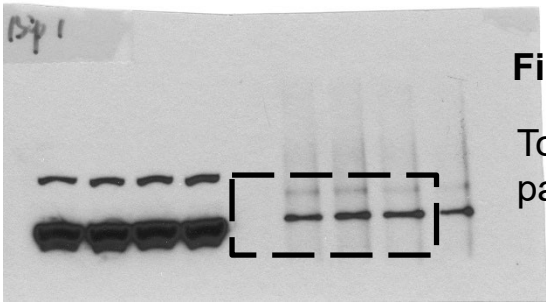

Figure 3F

Bottom left  
panel  
IB: α1

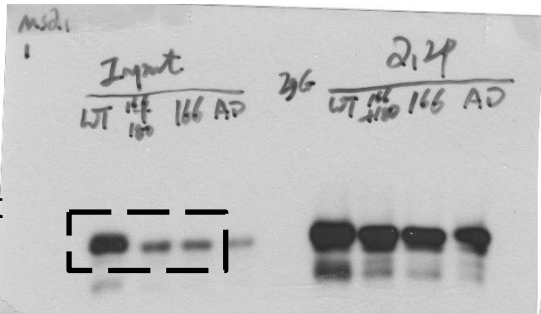

Figure 3F

Bottom right  
panel  
IB: α1

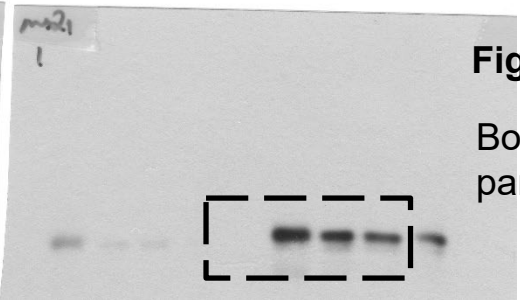

Supplement: fig3-data2 [file elife-84798-fig3-data2-v2.zip]
