# Supplementary material for: Hsp47 promotes biogenesis of multi-subunit neuroreceptors in the endoplasmic reticulum
Source: eLife journal article supplement (doi:10.7554/elife.84798), 2024-07-04
Supplement: fig1-data2 [file elife-84798-fig1-data2-v2.zip]

Figure 1

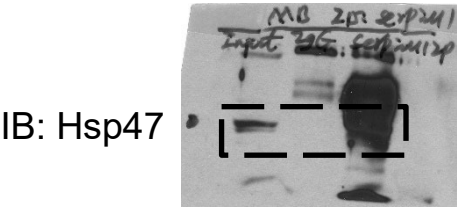

Figure 1A

Top panel

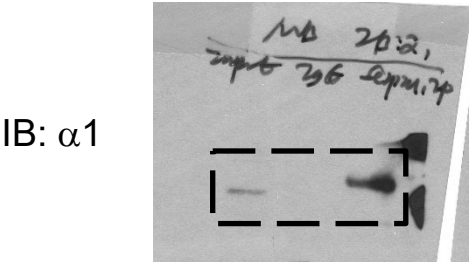

Figure 1A

bottom panel

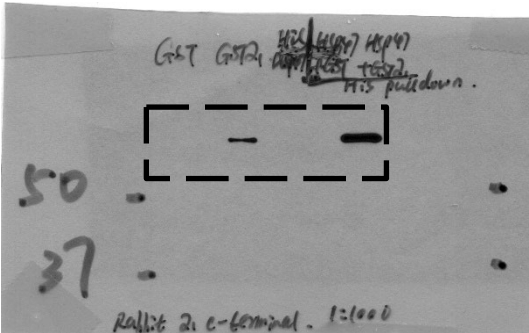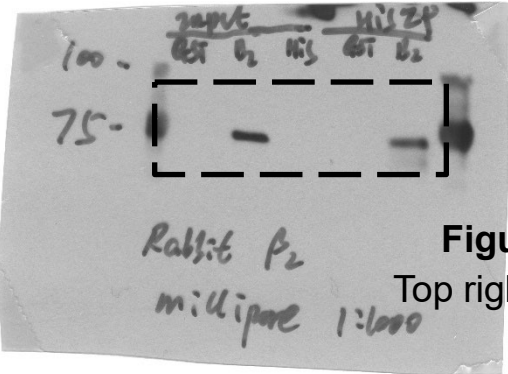

Figure 1B

Top right panel

Figure 1B  
Bottom left panel

IB: His

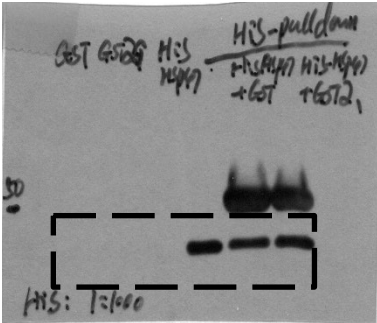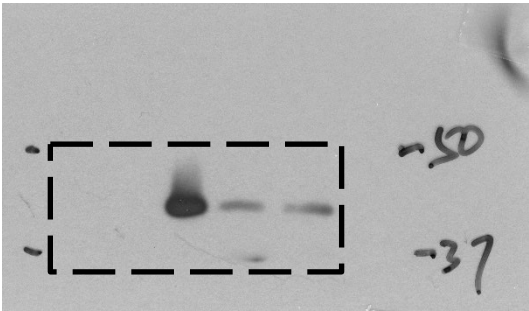

Figure 1B  
Bottom right panel
