# Supplementary material for: Hsp47 promotes biogenesis of multi-subunit neuroreceptors in the endoplasmic reticulum
Source: eLife journal article supplement (doi:10.7554/elife.84798), 2024-07-04
Supplement: fig2-data1 [file Figure 2-source data 1.xlsx]

## Sheet: Figure 2A
surface alpha1 fluorescence				surface beta2 fluorescence				surface gamma2 fluorescence
scrambled siRNA	SERPINH1 siRNA			scrambled siRNA	SERPINH1 siRNA			scrambled siRNA	SERPINH1 siRNA
3531.36	1434.84			5081.72	3567.71			2529.94	1480.68
2528.92	1703.8			5643.24	3241.12			2662.94	1791.28
2947.45	1801.92			4847.37	3442.17			1695.39	1469.3
3137.21	1235.34			3950.22	2242.84			1986.99	934.145
2328.17	2208.65			5224.93	3115.2			2842.25	1295.53
3425.56	1250.42			5167.2	3820.47			2369.84	1949.08
3138.23	1479.36			5248.64	2903.38			1742.08	1480.16
2826.58	1922.57			4137.76	2741.91			2270.61	1315.45
2327.47	1798.14			4907.71	2105.8			2236.52	1638.58
2998	1752.4			5130.57	2059.04			3376.61	1822.73
2862.72	1823.84			5456.8	2793.92			2808.96	1431.81
3305.12	2544.7			4647.24	2750.54			4131.41	858.281
2955.23	2011.25			5140.42	2934.76			2111.42	1515.02
2708.36	1564.53			4843.75	3472.24			3539.09	3032.14
2699.95	1886.68			4867.65	2661.78			3564.5	2533.15
3010.17	1613.55			4441.26	2594.26			2833.96	1334.81
3427.51	1927.39			4418.78	2649.17			3299.95	1795.07
3057.96	1837.74			3798.82	2979.04			3499.12	2164.65
3232.51	2430.18			4234.85	2124.91			4006.78	2157.14
2786.41	2053.38			4746.57	2225.9			2758.41	2474.25
3659.14	1420.85			5310.41	2783.26			2825.11	1419.03

## Sheet: Figure 2B
surface alpha1 fluorescence				surface beta2 fluorescence				surface gamma2 fluorescence				surface Hsp47 fluorescence
EV	SERPINH1			EV	SERPINH1			EV	SERPINH1			EV	SERPINH1
2943.59	3907.98			2809.35	7360.33			2998.16	3570.68			798.162	2018.63
2185.06	3801.26			2630.37	6551.46			2671.46	4586.53			1298.57	1655.19
3007.01	3345.72			2764.24	7006.95			2509.38	5462.44			788.77	2242.51
1978.78	2976.85			3819.86	8804.93			2831.05	3503.22			1048.61	1919.77
1946.04	4598			5433.47	7469.29			2700.78	5740.37			677.014	1625.7
3144.98	3579.83			5879.39	7531.73			2322.77	4182.13			1186.38	1916.84
1921.33	6588			4706.73	8865.61			2910.08	6207.07			981.273	1622.75
2338.28	3616.34			5003.94	7769.75			2931.87	5155.8			1022.24	1922.38
3082.06	6032.44			5841.31	9062.85			3824.69	4234.22			936.477	2682.55
2575.24	3468.83			7148.76	6242.71			3204.48	5775.87			563.324	2020.06
2224.19	5539.25			3039.3	6147.1			2353.64	4315.05			864.781	2580.73
2584.98	7389.64			3048.54	7678.1			2800.21	3889.8			499.351	1884.7
4377.91	5151.77			6906.71	8446.45			3088.69	5678.07			593.276	1823.96
3340.47	7765.17			2522.7	7951.78			2719.9	6283.3			1018.64	1599.25
2964.02	3146.55			5723.7	6770.31			2834.74	4715.51			630.599	1523.58
2040.05	7132.72			5499.96	5154.16			3334.92	6022.78			786.37	2148.56
4610.64	5469.8			4962.47	7554.55			3589.71	5514.43			488.029	1668.26
4613.85	7532.03			6988.01	8849.18			2232.58	4262.61			1011	1302.57
3673.22	5406.16			6105.27	8357.42			2231.18	4732.93			908.884	1976.03
2589.66	6406.73			3897.54	8327.8			3539.63	4492.3			836.337	1457.17
3489.32	6103.82			6565.15	7829.98			3029.8	4492.93			990.442	1704.19

## Sheet: Figure 2C
Peak current amplitude
SERPINH1 siRNA	control	SERPINH1 cDNA
1475.8	981.2	2920.9
1675.1	1161.9	2774
2363.6	779.5	1914.7
1404.5	920.9	2904.5
2411.8	784	2611.8
1375.9	811.7	2375.9
1211.5	993.7	1981.2
1403.8	628.4	2158.8
1518.2	779.5
1757.9	1020.9
