# Supplementary material for: Hsp47 promotes biogenesis of multi-subunit neuroreceptors in the endoplasmic reticulum
Source: eLife journal article supplement (doi:10.7554/elife.84798), 2024-07-04
Supplement: fig2-figsupp1-data3 [file Figure 2-figure supplement 1-source data 5.xlsx]

## Sheet: Figure 2-figure supplement 1B
Hsp47 fluorescence
scrambled siRNA	SERPINH1 siRNA
3359.61	1656.59
3922.83	1318.54
3627.39	876.307
3899.99	877.049
2245.83	824.242
2624.03	874.603
2284.25	1328.97
2213.02	1046.06
2814.18	693.455
3155.1	1025.8
3383.09	907.329
2961.89	720.612
2570.35	856.035
3083.34	1069.67
2606.02	1342.2
3702.44	933.289
2930.83	913.158
2053.05	607.496
3049.19	1095.61
2455.12	740.884
3539.23	909.865
