# Supplementary material for: Hsp47 promotes biogenesis of multi-subunit neuroreceptors in the endoplasmic reticulum
Source: eLife journal article supplement (doi:10.7554/elife.84798), 2024-07-04
Supplement: fig3-data3 [file Figure 3-source data 20.xlsx]

## Sheet: Figure 3A
Endo H
EV	SERPINH1
0.4211	0.72426
0.3858	0.75074
0.3512	0.6511

## Sheet: Figure 3B
Co-IP
DTT-0	DTT-5mM	DTT-10mM	DTT-20mM
1.26905	0.32457	0.04548	0.03762
1.155	0.25576	0.13584	0.02176
0.856	0.2235	0.24894	0.01769

## Sheet: Figure 3C
Co-IP
WT	C166A	C166A/C180A
0.91564	0.14928	0.27896
1.211	0.16303	0.2051
1.065	0.06154	0.21195

## Sheet: Figure 3D
Insoluble
WT	C166A/C180A	C166A
0.18735	1.30893	7.31793
0.26372	1.65	8.022
0.1125	1.85	6.5

## Sheet: Figure 3E
Co-IP
DTT-0	DTT-5mM	DTT-10mM	DTT-20mM
0.88899	6.25521	7.60901	7.95832
1.10001	6.64167	6.92635	9.36203
1.20004	7.15516	6.73874	8.66105

## Sheet: Figure 3F
Co-IP
WT	C166A/C180A	C166A
0.84974	1.99632	3.23905
1.10001	2.38775	3.95928
1.21001	3.55539	4.22109
