# Supplementary material for: Hsp47 promotes biogenesis of multi-subunit neuroreceptors in the endoplasmic reticulum
Source: eLife journal article supplement (doi:10.7554/elife.84798), 2024-07-04

Figure 3—figure supplement 1

Figure 3—figure supplement 1B, top panel

IB: ubiquitin

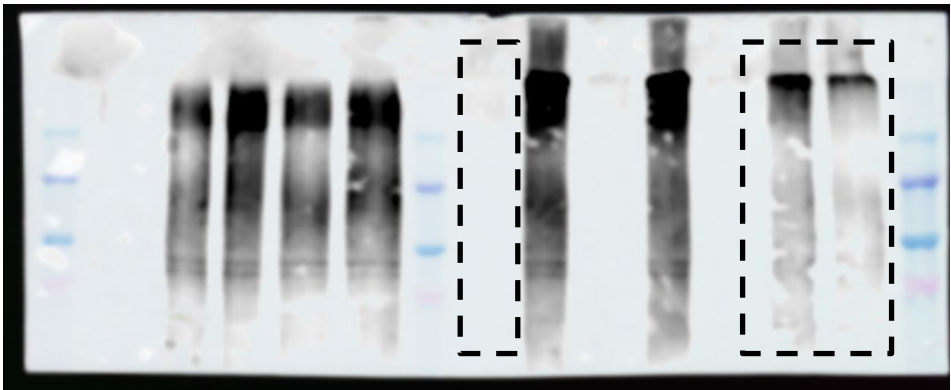

Figure 3—figure supplement 1B, bottom panel

IB:  $\alpha 1$

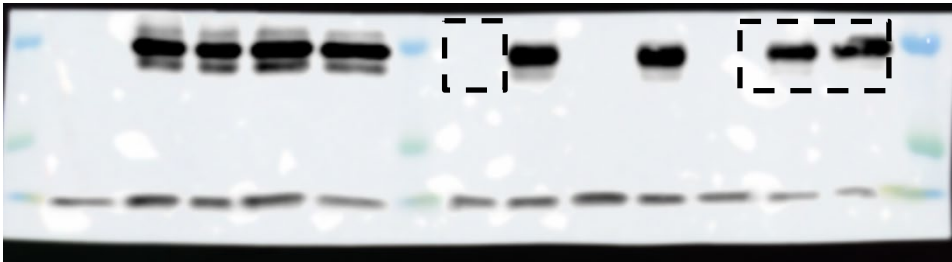

Figure 3—figure supplement 1C

IB:  $\alpha 1$

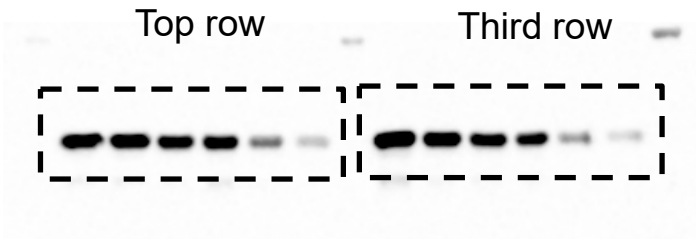

Second row

Bottom row

Figure 3—figure supplement 1C

IB:  $\beta$ -actin

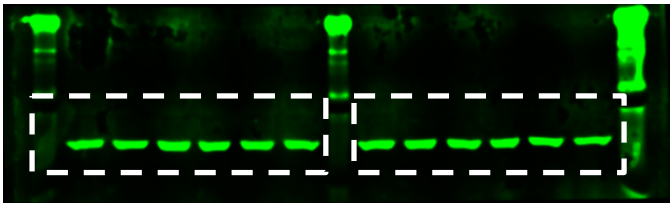

Figure 3—figure supplement 1

Figure 3—figure supplement 1D

IB:  $\alpha 1$

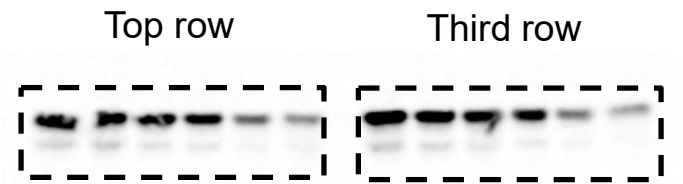

Figure 3—figure supplement 1D

IB:  $\beta$ -actin

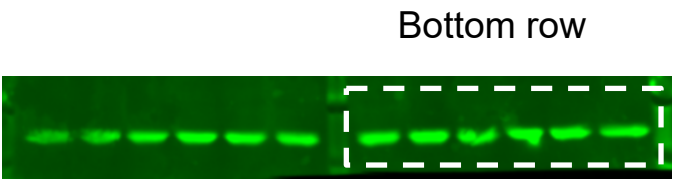

Figure 3—figure supplement 1D

IB:  $\beta$ -actin

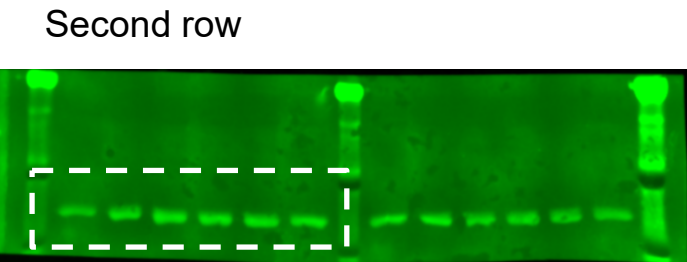

Figure 3—figure supplement 1E, top panel

IB: BiP

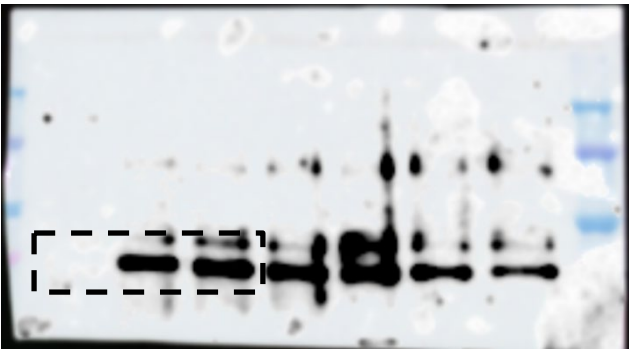

Figure 3—figure supplement 1E, bottom panel

IB:  $\alpha 1$

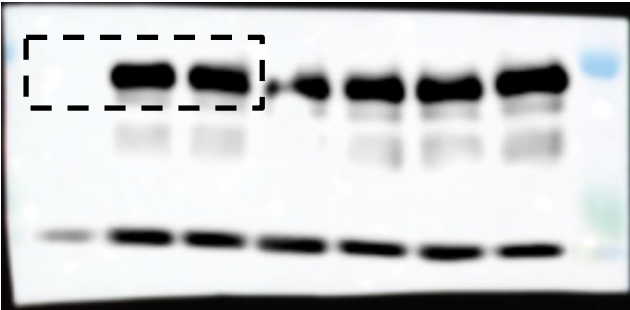

Supplement: fig3-figsupp1-data2 [file Figure 3-figure supplement 1-source data 10.pdf › Figure 3-figure supplement 1-source data 10/Figure 3-figure supplement 1-source data 10.pdf]
