# Supplementary material for: Hsp47 promotes biogenesis of multi-subunit neuroreceptors in the endoplasmic reticulum
Source: eLife journal article supplement (doi:10.7554/elife.84798), 2024-07-04
Supplement: fig3-figsupp1-data3 [file Figure 3-figure supplement 1-source data 11.xlsx]

## Sheet: Figure 3-figure supplement  1A
Peak current amplitude
EV	SERPINH1
528.655	760.713
166.38	340.904
337.507	391.042
308.931	695.79
143.867	474.505
451.027	292.099
311.986	403.899
600.284	468.614
159.8	331.487
78.02	555.571
247.972	502.713
	617.136

## Sheet: Figure 3-figure supplement 1B
Normalized Ubiquitin intensity
	Rep1	Rep2	Rep3	Average	SD
EV	1.0929	1.0604	0.83668	0.99666	0.13949
SERPINH1	0.57794	0.61044	0.82416	0.67085	0.13376

## Sheet: Figure 3-figure supplement 1E
Normalized BiP intensity
	Rep1	Rep2	Rep3	Average	SD
NT	0.8539	0.93643	1.21155	1.00063	0.18727
SERPINH1 si	0.95116	0.86863	0.5835	0.8011	0.19291
