# Supplementary material for: Hsp47 promotes biogenesis of multi-subunit neuroreceptors in the endoplasmic reticulum
Source: eLife journal article supplement (doi:10.7554/elife.84798), 2024-07-04
Supplement: fig4-data2 [file elife-84798-fig4-data2-v2.zip]

Figure 4B

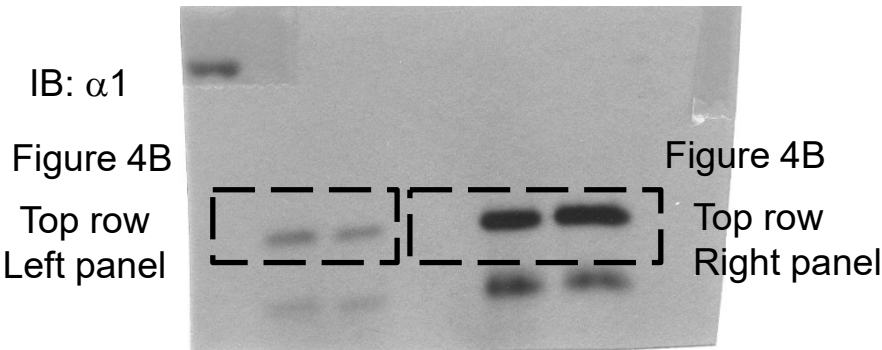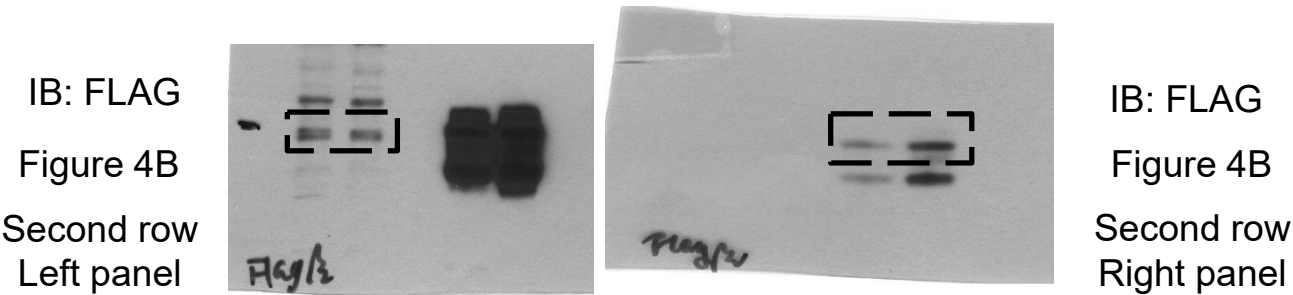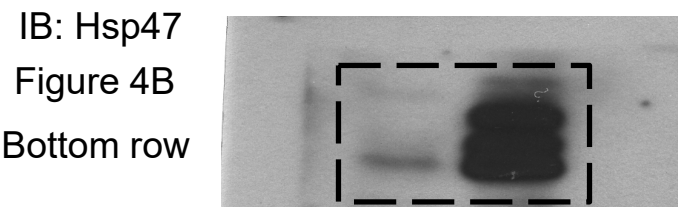

Figure 4C

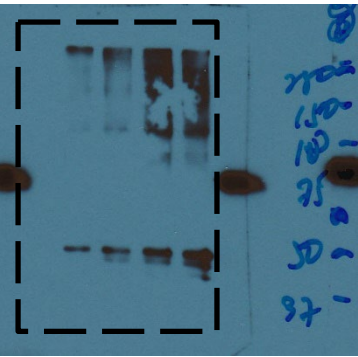

Figure 4C  
IB:  $\alpha 1$   
Row 1  
Column 1

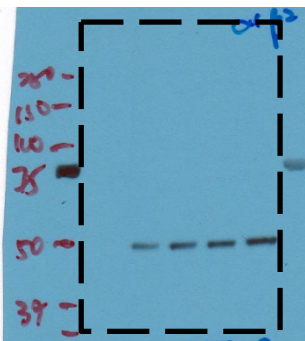

Figure 4C  
Row 1  
Column 2

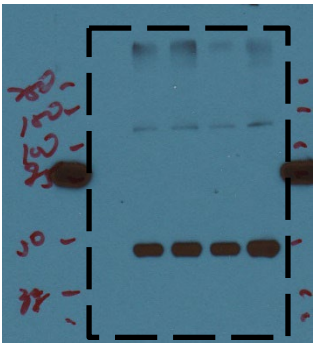

Figure 4C  
Row 1  
Column 3

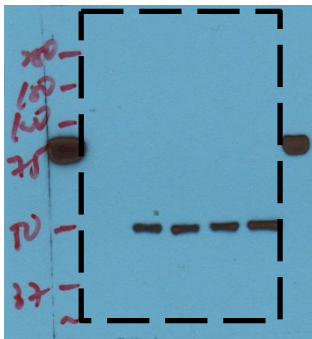

Figure 4C  
Row 1  
Column 4

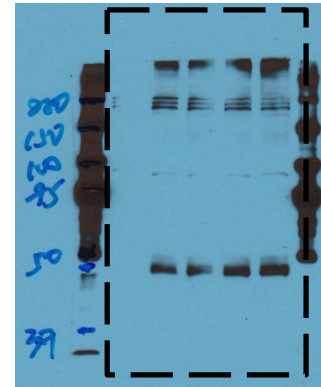

Figure 4C  
IB:  $\beta 2$   
Row 2  
Column 1

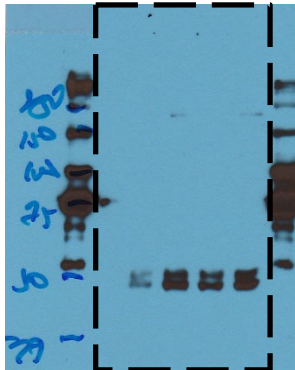

Figure 4C  
Row 2  
Column 2

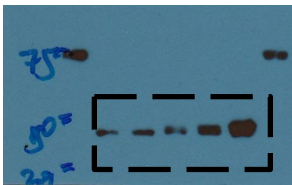

Figure 4C  
IB: Hsp47  
Row 3  
Column 1

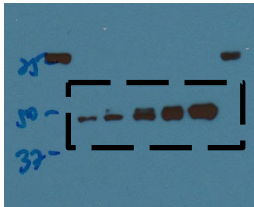

Figure 4C  
Row 3  
Column 2

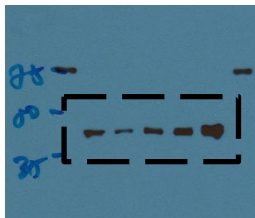

Figure 4C  
Row 3  
Column 3

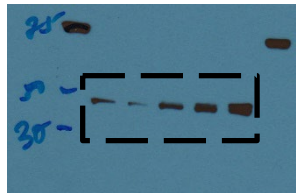

Figure 4C  
Row 3  
Column 4

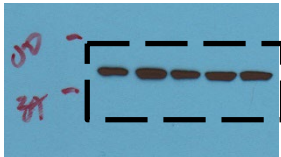

Figure 4C  
IB:  $\beta$ -actin  
Row 4  
Column 1

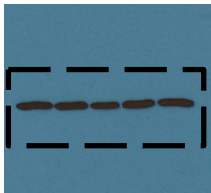

Figure 4C  
Row 4  
Column 2

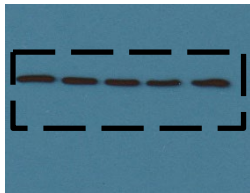

Figure 4C  
Row 4  
Column 3

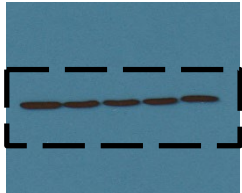

Figure 4C  
Row 4  
Column 4
