# Supplementary material for: Hsp47 promotes biogenesis of multi-subunit neuroreceptors in the endoplasmic reticulum
Source: eLife journal article supplement (doi:10.7554/elife.84798), 2024-07-04
Supplement: fig4-data3 [file Figure 4-source data 20.xlsx]

## Sheet: Figure 4A
FRET
EV	SERPINH1
28.842	23.856
19.376	31.763
20.786	28.811
25.879	32.439
26.842	33.721
26.729	30.988
25.28	25.645
19.851	26.07
25.113	22.044
21.333	23.23
25.143	26.307
24.156	34.579
17.851	35.982
23.621	42.539
24.115	40.528
21.919	35.248
29.757	26.224
24.165	23.088
27.916	27.972
19.552	26.369
25.049	30.941
26.738	23.991
26.912	27.496
24.441	36.102
20.504	25.679
28.784	27.029
24.997	26.384
27.14	36.417
23.162	41.053
26.431	39.737
	38.384
	31.977
	37.229
	39.745
	36.026
	37.217
	31.114
	36.279
	32.418
	34.687
	32.425

## Sheet: Figure 4B
Co-IP
FLAG/alpha1 post IP			Hsp47 intensity
EV	SERPINH1		EV	SERPINH1
0.90057	3.68741		1.167	12.3
0.99998	3.12726		0.871	8.2
1.21001	2.68724		1.065	7.5

## Sheet: Figure 4D
alpha1 complex					beta2 complex
Lane 2	Lane 3	Lane 4	Lane 5		Lane 2	Lane 3	Lane 4	Lane 5
1.11	1.41	3.21	2.4		1.1	1.1	2.45	2.85
0.9	1.01	2.61	2.7		0.9	0.95	2.01	3.21
1.04	1.2	2.95	2.9		0.85	1.25	2.75	2.6

## Sheet: Figure 4E
alpha1 monomer					beta2 monomer
Lane 7	Lane 8	Lane 9	Lane 10		Lane 7	Lane 8	Lane 9	Lane 10
0.9	1.22	1.42	1.91		0.95	1.5	1.6	1.62
1.08	1.05	1.5	1.71		1.12	1.4	1.8	2.08
1.03	1.3	1.8	2.11		0.95	2	2	1.82
