# Supplementary material for: Hsp47 promotes biogenesis of multi-subunit neuroreceptors in the endoplasmic reticulum
Source: eLife journal article supplement (doi:10.7554/elife.84798), 2024-07-04

**Figure 5**

Figure 5A  
Top panel

IB:  $\alpha 1$

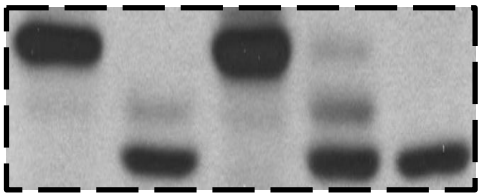

Figure 5A  
Middle panel

IB: Hsp47

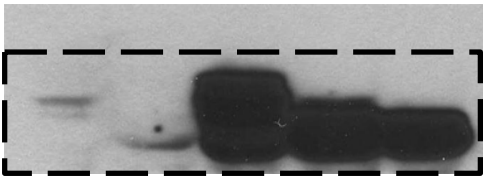

Figure 5A  
Bottom panel

IB:  $\beta$ -actin

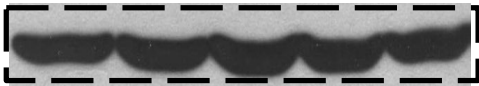

Figure 5B,  
top panel

IB: ubiquitin

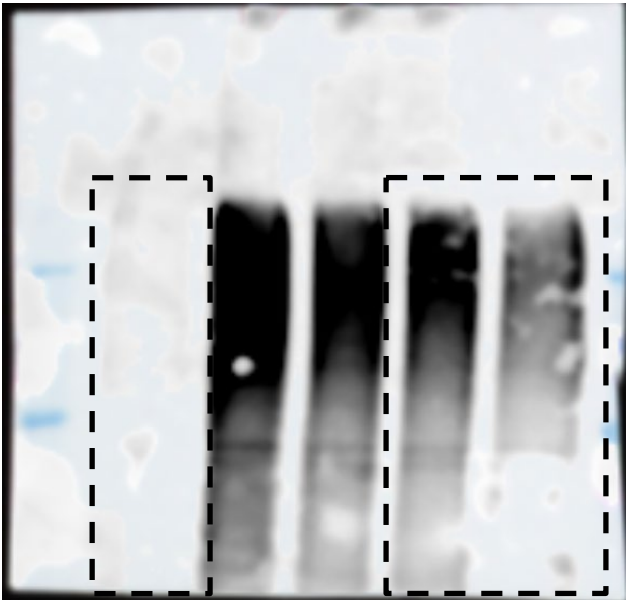

Figure 5B,  
bottom panel

IB:  $\alpha 1$

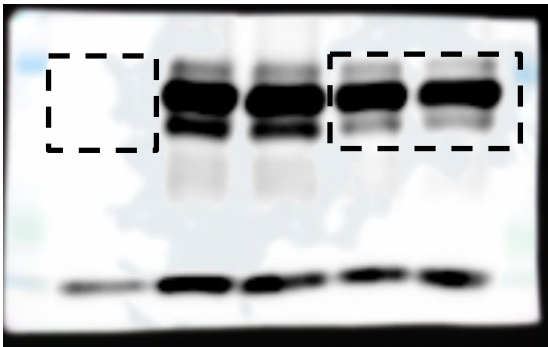

**Figure 5**

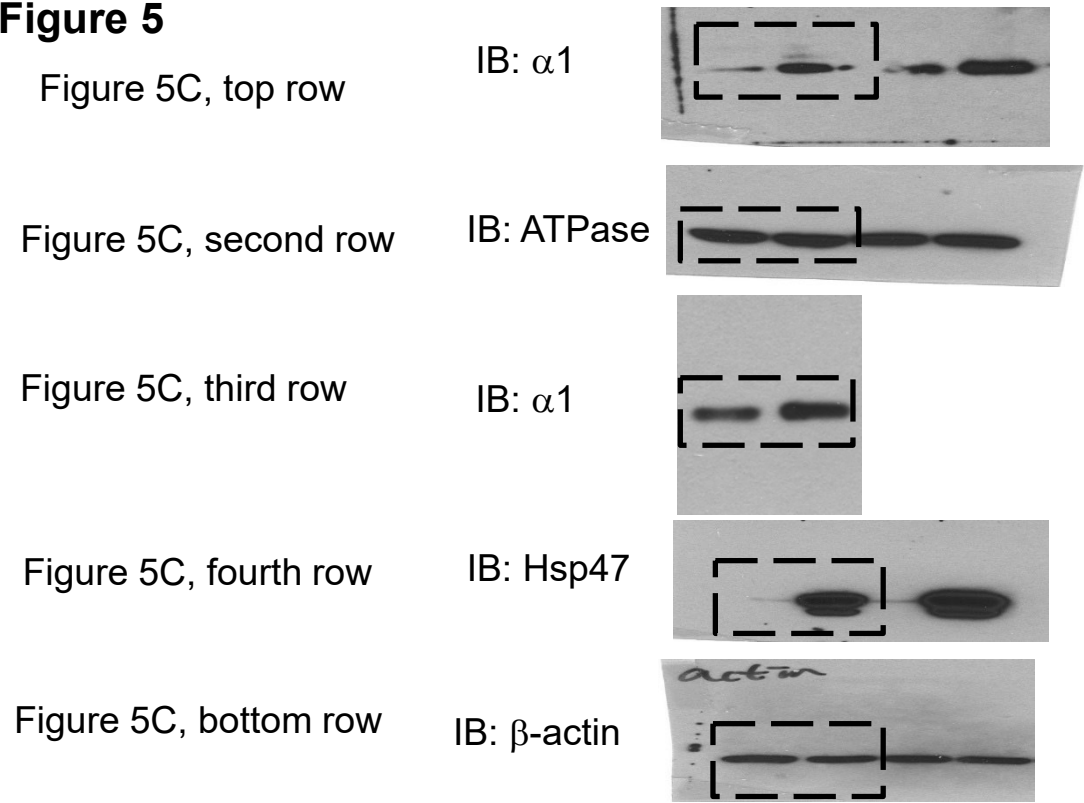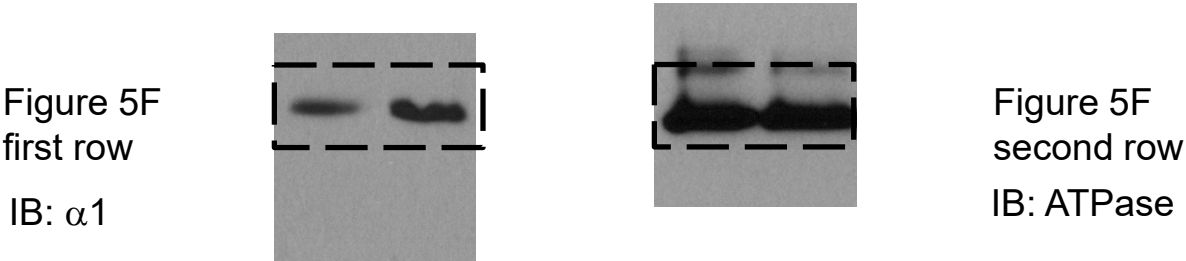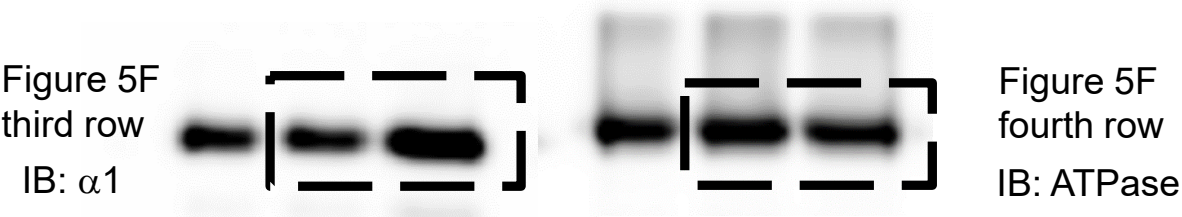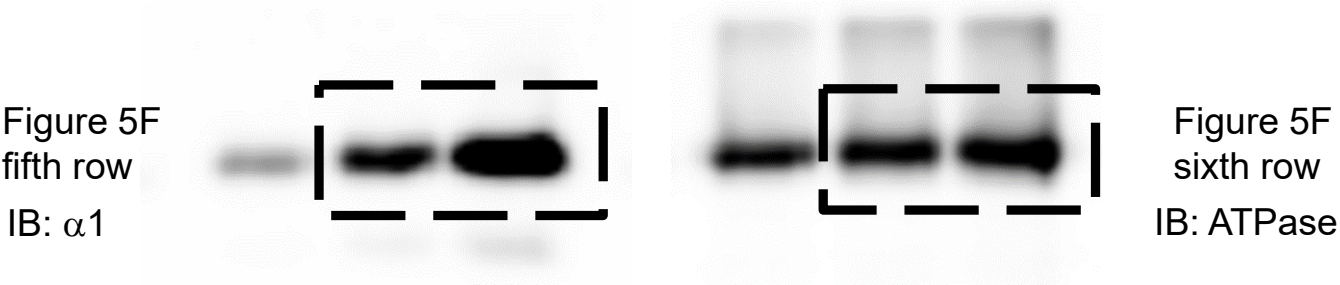

Supplement: fig5-data2 [file elife-84798-fig5-data2-v2.zip]
