# Supplementary material for: Hsp47 promotes biogenesis of multi-subunit neuroreceptors in the endoplasmic reticulum
Source: eLife journal article supplement (doi:10.7554/elife.84798), 2024-07-04
Supplement: fig5-data3 [file Figure 5-source data 18.xlsx]

## Sheet: Figure 5A
Endo H
Endo H/total alpha1			Hsp47
EV	SERPINH1		EV	SERPINH1
0.21487	0.30815		0.911	11.22
0.21778	0.43799		1.251	7.234
0.16177	0.29328		1.006	6.598

## Sheet: Figure 5B
Normalized Ubiquitin intensity
	Rep1	Rep2	Rep3	Rep4	Average	SD
EV	1.159	1.08191	0.73567	1.02341	1	0.18476
SERPINH1	0.39057	0.46766	0.8239	0.52616	0.55207	0.18953

## Sheet: Figure 5C
a1(A322D)
surface alpha1			total alpha1			Hsp47
EV	SERPINH1		EV	SERPINH1		EV	SERPINH1
0.899	2.899		0.967	1.689		1.226	9.655
1.11	3.251		1.115	1.426		0.889	8.258
1.201	2.55		0.857	1.556		1.036	6.258

## Sheet: Figure 5D
Peak current amplitude
EV	SERPINH1
14.6	29
4.9	42.7
6.4	38.1
3.7	51
15.9	71.1
4.9	97.4
12.5	72
4.3	29
8.9	39.4
3.4	49.4
4	41.2
5.5	36.6
16.2	73.2
4.3	69.3
5.2	51.9
8.9	29.9
9.8	33.6
11
12.1
12.8

## Sheet: Figure 5F
Normalized surface a1 intensity
S76R
	Rep1	Rep2	Rep3	Average	SD
EV	1.12	0.95	0.91	0.99333	0.1115
SERPINH1	2.64	2.31	2.11	2.35	0.26764
D219N
	Rep1	Rep2	Rep3	Average	SD
EV	1.25	0.78	0.96	0.99667	0.23714
SERPINH1	2.62	2.75	1.87	2.41	0.47501
G251D
	Rep1	Rep2	Rep3	Average	SD
EV	1.24	0.86	0.92	1.00667	0.20429
SERPINH1	2.65	1.62	2.12	2.13	0.51507

## Sheet: Figure 5G
Imax
S76R
	Rep1	Rep2	Rep3	Rep4	Rep5	Rep6	Rep7	Rep8	Average	SD
EV	475	1030	385	493	966	879	1423	780	803.875	347.893
SERPINH1	1350	1450	950	774	1535	1936	947		1277.43	409.255
D219N
	Rep1	Rep2	Rep3	Rep4	Rep5	Rep6	Rep7	Rep8	Rep9	Rep10	Rep11	Rep12	Average	SD
EV	1.938	1.521	5.325	2.912	5.71	8.157	2.855	7.334	4.494	5.229	2.543	2.735	4.22942	2.14929
SERPINH1	3.758	2.077	9.545	11.862	10.449	5.863							7.259	3.94077
G251D
	Rep1	Rep2	Rep3	Rep4	Rep5	Rep6	Rep7	Rep8	Rep9	Average	SD
EV	314	269	559	353	391	1210	420	608	470	510.444	284.388
SERPINH1	550	950	800	1400	356	1680				956	504.087
