# Supplementary material for: Hsp47 promotes biogenesis of multi-subunit neuroreceptors in the endoplasmic reticulum
Source: eLife journal article supplement (doi:10.7554/elife.84798), 2024-07-04

**Figure 5—figure supplement 1**

Figure 5—figure supplement 1A

IB:  $\alpha 1$

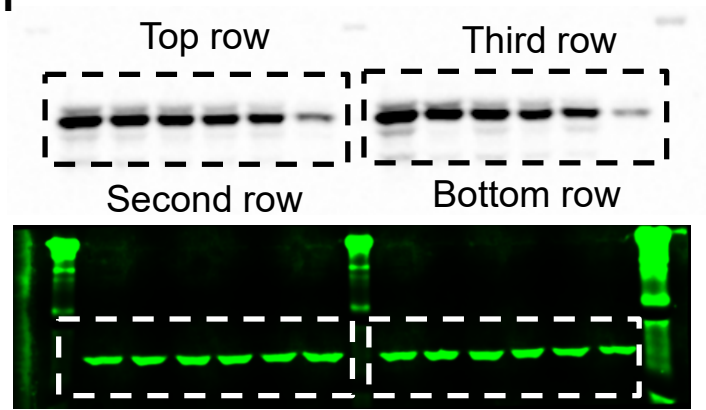

Figure 5—figure supplement 1A

IB:  $\beta$ -actin

Figure 5—figure supplement 1B

IB:  $\alpha 1$

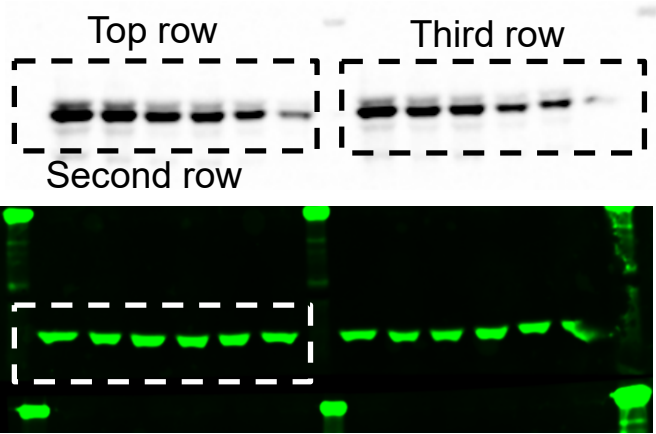

Figure 5—figure supplement 1B

IB:  $\beta$ -actin

Figure 5—figure supplement 1B

IB:  $\beta$ -actin

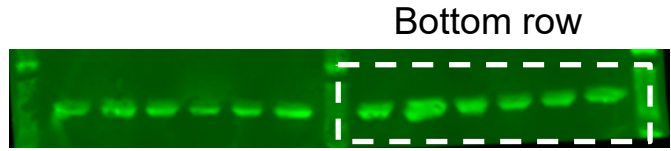

Figure 5—figure supplement 1C, top panel

IB: BiP

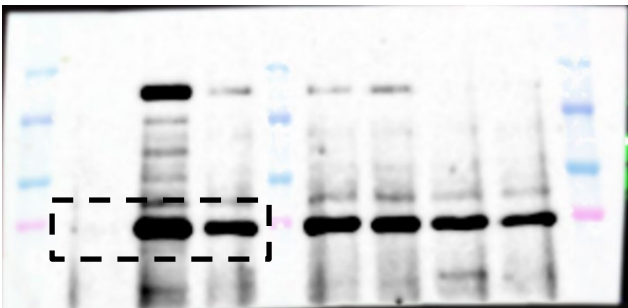

Figure 5—figure supplement 1C, bottom panel

IB:  $\alpha 1$

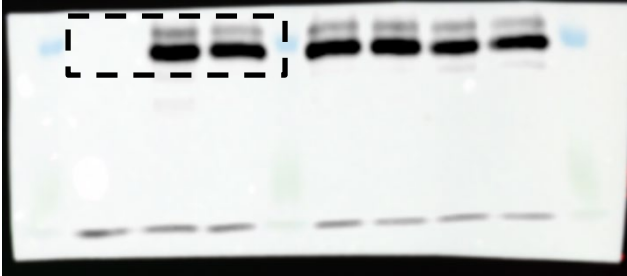

Supplement: fig5-figsupp1-data2 [file Figure 5-figure supplement 1-source data 8.pdf › Figure 5-figure supplement 1-source data 8/Figure 5-figure supplement 1-source data 8.pdf]
