# Supplementary material for: Hsp47 promotes biogenesis of multi-subunit neuroreceptors in the endoplasmic reticulum
Source: eLife journal article supplement (doi:10.7554/elife.84798), 2024-07-04
Supplement: fig5-figsupp1-data3 [file Figure 5-figure supplement 1-source data 9.xlsx]

## Sheet: Figure 5-figure supplement 1C
Normalized BiP intensity
	Rep1	Rep2	Rep3	Rep4	Rep5	Rep6	Average	SD
NT	1.07024	0.93372	0.96851	1.02784	0.9933	1.00341	0.9995	0.04722
SERPINH1 si	0.79196	0.92847	0.89369	0.83436	0.8689	0.852	0.86156	0.04741
