# Supplementary material for: Hsp47 promotes biogenesis of multi-subunit neuroreceptors in the endoplasmic reticulum
Source: eLife journal article supplement (doi:10.7554/elife.84798), 2024-07-04
Supplement: fig5-figsupp2-data3 [file Figure 5-figure supplement 2-source data 4.xlsx]

## Sheet: Figure 5-figure supplement 2
Normalized Hsp47 intensity
alpha1(S76R)			alpha1(D219N)			alpha1(G251D)
EV	SERPINH1		EV	SERPINH1		EV	SERPINH1
0.897	3.511		1.201	2.879		1.195	2.763
0.998	3.112		0.911	4.021		0.925	3.554
1.211	4.556		0.963	3.012		1.079	3.456
