# Supplementary material for: Hsp47 promotes biogenesis of multi-subunit neuroreceptors in the endoplasmic reticulum
Source: eLife journal article supplement (doi:10.7554/elife.84798), 2024-07-04
Supplement: fig6-data2 [file elife-84798-fig6-data2-v2.zip]

IB: Hsp47

**IB:  $\alpha 1$**

— [ ] —

IB: BiP

IB: ATF6-N

Handwritten labels above the gel: 13 and 15. Lane labels: 90, 50, 12. A large black box obscures the bottom half of the gel.

IB: XBP1s

IB: CHOP

IB:  $\beta$ -actin

Figure 6

Figure 6A  
Right column  
First row

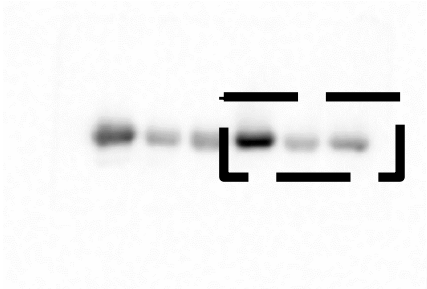

IB: Hsp47

Figure 6A  
Right column  
Second row

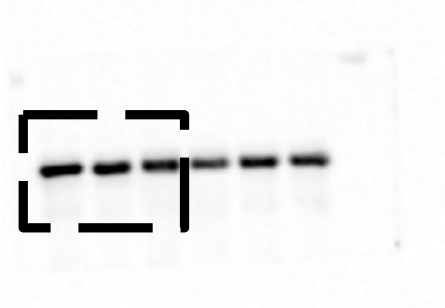

IB:  $\alpha$ 1

Figure 6A  
Right column  
Third row

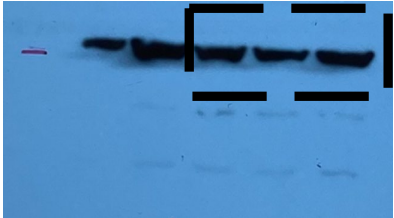

IB: BiP

Figure 6A  
Right column  
Fourth row

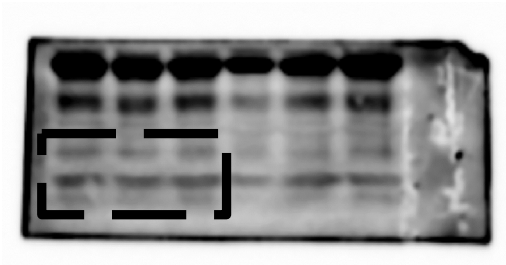

IB: ATF6-N

Figure 6A  
Right column  
Fifth row

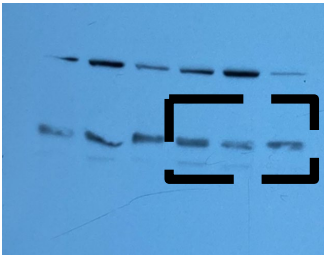

IB: XBP1s

Figure 6A  
Right column  
Sixth row

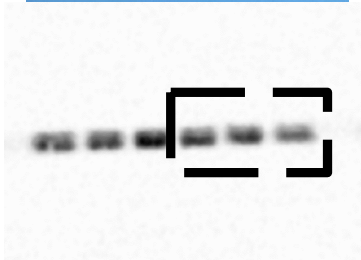

IB: CHOP

Figure 6A  
Right column  
Seventh row

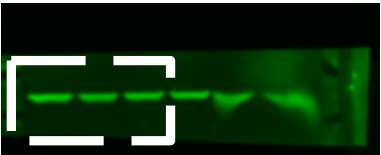

IB:  $\beta$ -actin

**Figure 6**

Figure 6B  
Left column  
First row

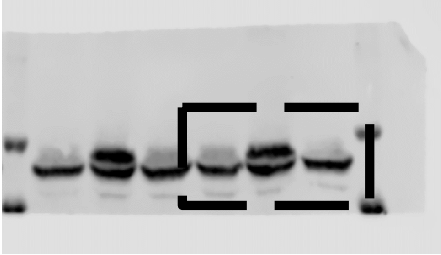

IB: Hsp47

Figure 6B  
Left column  
Second row

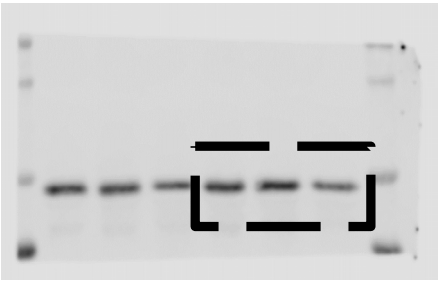

IB:  $\alpha 1$

Figure 6B  
Left column  
Third row

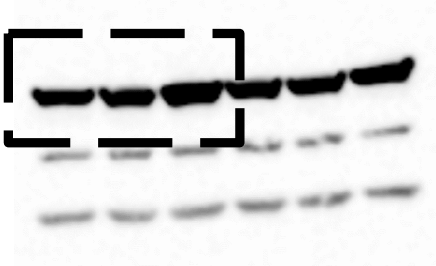

IB: BiP

Figure 6B  
Left column  
Fourth row

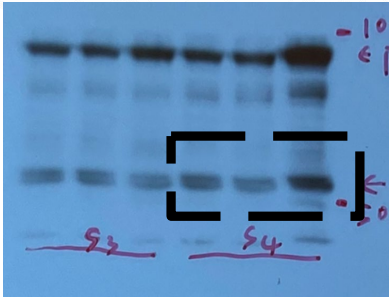

IB: ATF6-N

Figure 6B  
Left column  
Fifth row

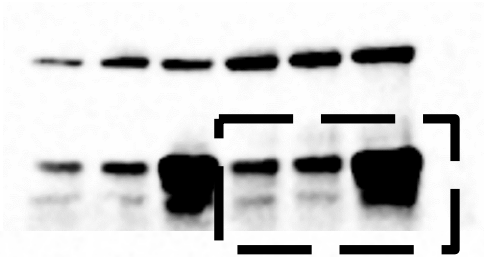

IB: XBP1s

Figure 6B  
Left column  
Sixth row

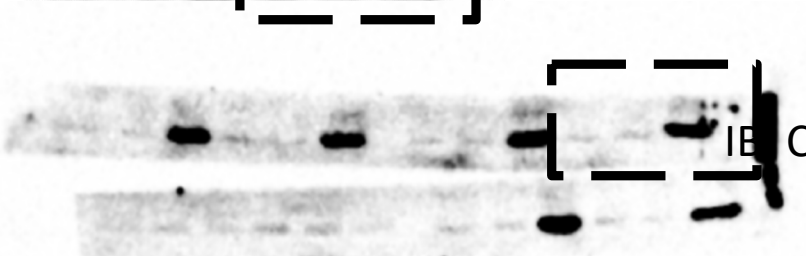

IB: CHOP

Figure 6B  
Left column  
Seventh row

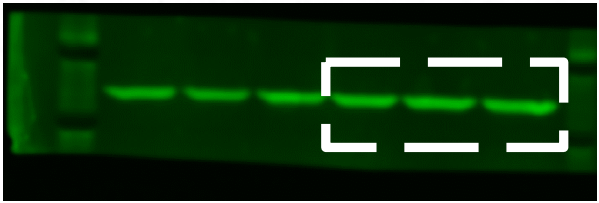

IB:  $\beta$ -actin

**Figure 6**

Figure 6B  
Right column  
First row

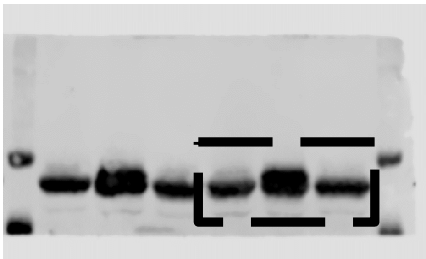

IB: Hsp47

Figure 6B  
Right column  
Second row

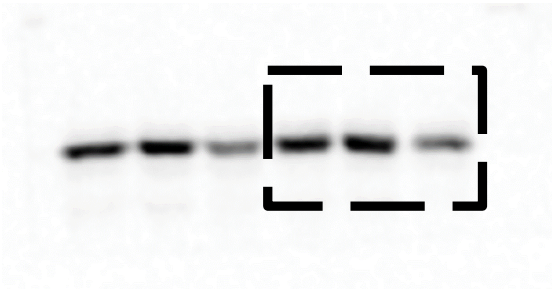

IB:  $\alpha 1$

Figure 6B  
Right column  
Third row

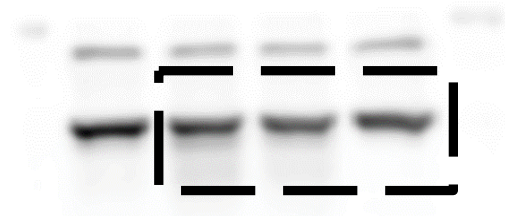

IB: BiP

Figure 6B  
Right column  
Fourth row

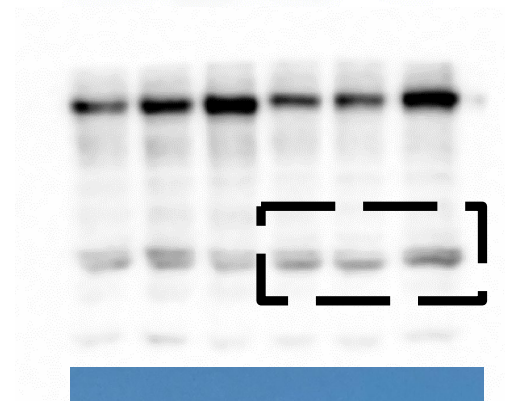

IB: ATF6-N

Figure 6B  
Right column  
Fifth row

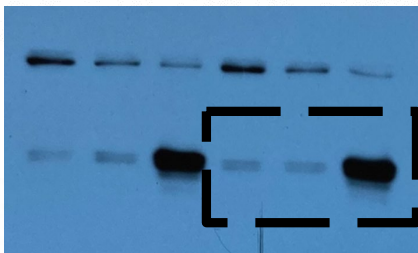

IB: XBP1s

Figure 6B  
Right column  
Sixth row

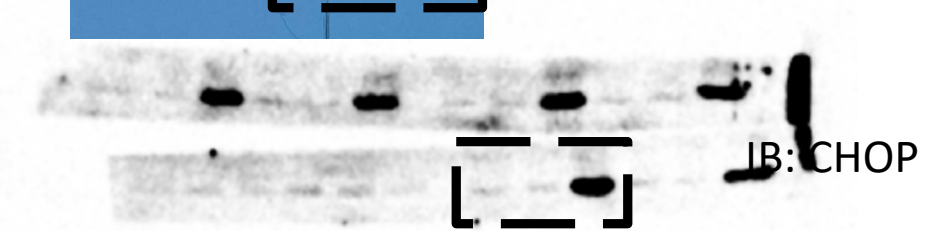

IB: CHOP

Figure 6B  
Right column  
Seventh row

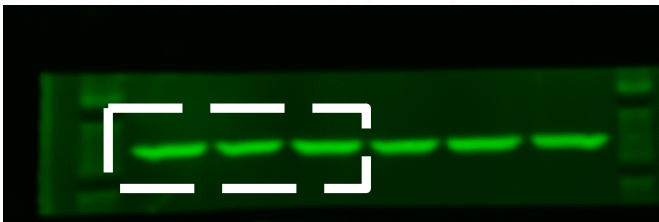

IB:  $\beta$ -actin

Figure 6

IB: Hsp47

Figure 6C  
First row

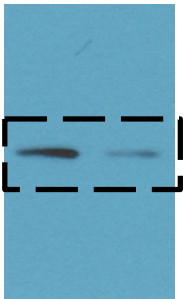

IB: BiP

Figure 6C  
Fifth row

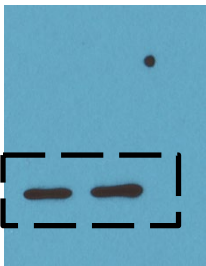

IB:  $\alpha 1$

Figure 6C  
Second row

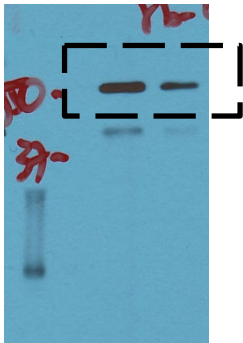

IB: ATF6

Figure 6C  
Sixth row

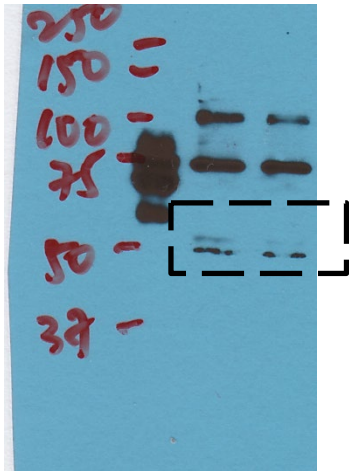

IB:  $\beta 2/3$

Figure 6C  
Third row

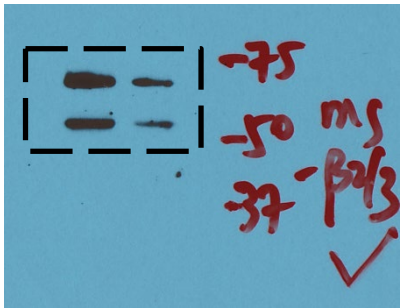

IB: XBP1

Figure 6C  
Seventh row

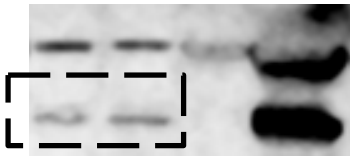

IB:  $\gamma 2$

Figure 6C  
Fourth row

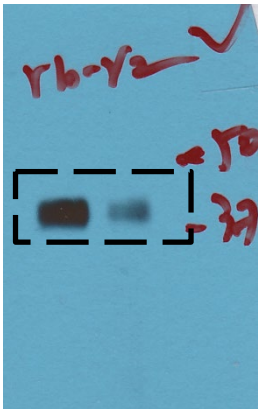

IB:  $\beta$ -actin

Figure 6C  
Eighth row

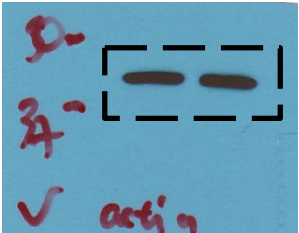



Figure 6

Figure 6D  
Left column  
First row

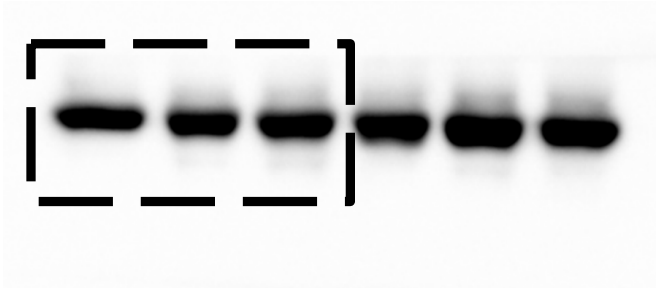

IB: Hsp47

Figure 6D  
Left column  
Second row

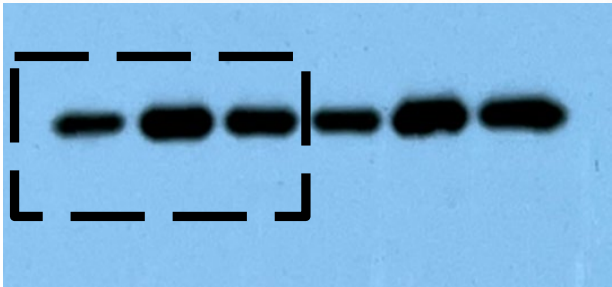

IB:  $\alpha$ 1

Figure 6D  
Left column  
Third row

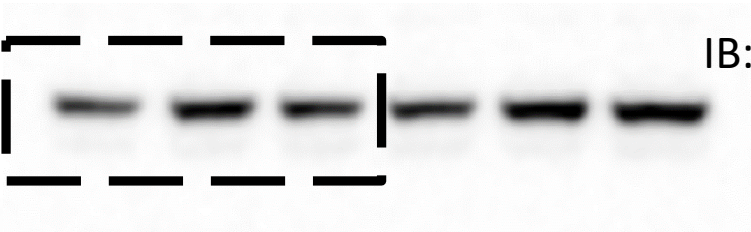

IB: BiP

Figure 6D  
Left column  
Fourth row

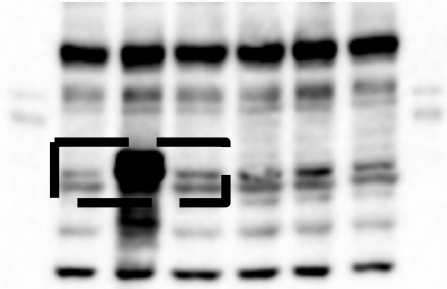

IB: ATF6-N

Figure 6D  
Left column  
Fifth row

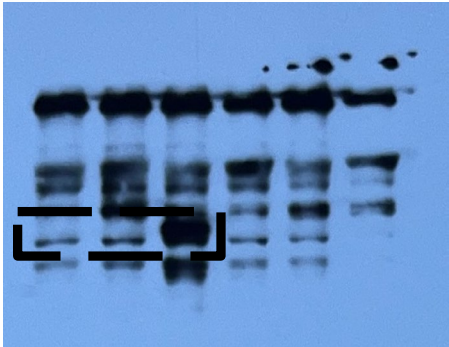

IB: XBP1s

Figure 6D  
Left column  
Sixth row

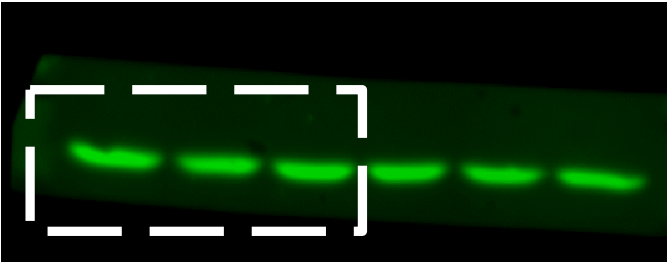

IB:  $\beta$ -actin

**Figure 6**

Figure 6D  
Right column  
First row

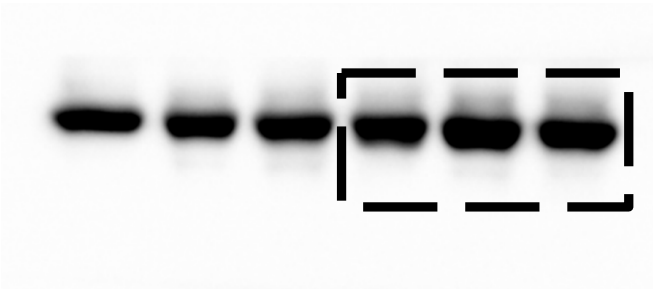

IB: Hsp47

Figure 6D  
Right column  
Second row

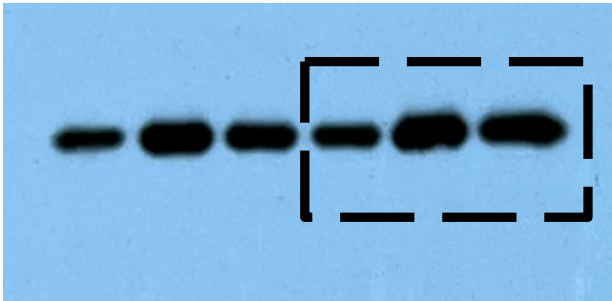

IB:  $\alpha$ 1

Figure 6D  
Right column  
Third row

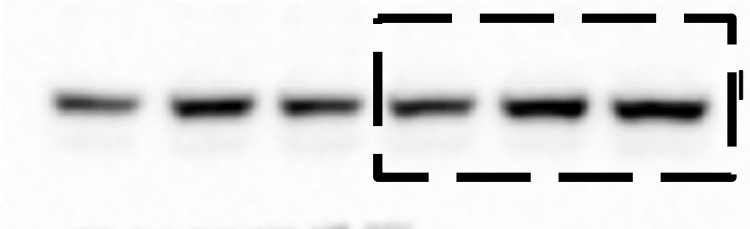

IB: BiP

Figure 6D  
Right column  
Fourth row

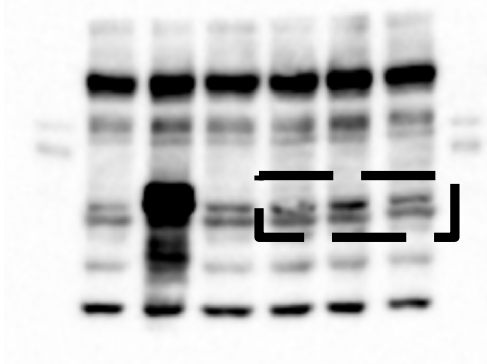

IB: ATF6-N

Figure 6D  
Right column  
Fifth row

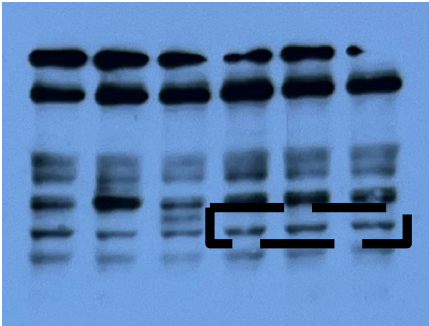

IB: XBP1s

Figure 6D  
Right column  
Sixth row

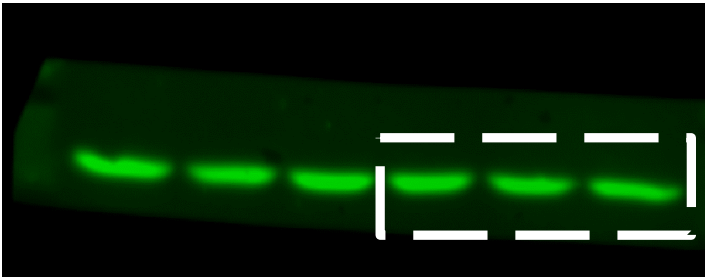

IB:  $\beta$ -actin
