# Supplementary material for: Hsp47 promotes biogenesis of multi-subunit neuroreceptors in the endoplasmic reticulum
Source: eLife journal article supplement (doi:10.7554/elife.84798), 2024-07-04
Supplement: fig6-data3 [file Figure 6-source data 50.xlsx]

## Sheet: Figure 6A
Normalized protein band intensity
Hsp47 - WT							Hsp47 - A322D
	Rep1	Rep2	Rep3	Average	SD			Rep1	Rep2	Rep3	Average	SD
NT	1.08	0.84	1.1	1.00667	0.14468		NT	1.05	0.85	1.1	1	0.13229
SERPINH1 si-1	0.52	0.48	0.35	0.45	0.08888		SERPINH1 si-1	0.1	0.05	0.25	0.13333	0.10408
SERPINH1 si-2	0.65	0.42	0.72	0.59667	0.15695		SERPINH1 si-2	0.05	0.11	0.15	0.10333	0.05033
a1 - WT							a1 - A322D
	Rep1	Rep2	Rep3	Average	SD			Rep1	Rep2	Rep3	Average	SD
NT	1.12	0.95	0.9	0.99	0.11533		NT	1.18	0.84	1.02	1.01333	0.1701
SERPINH1 si-1	0.95	0.82	0.92	0.89667	0.06807		SERPINH1 si-1	0.92	1.14	1.19	1.08333	0.14364
SERPINH1 si-2	0.52	0.74	0.86	0.70667	0.17243		SERPINH1 si-2	0.91	0.98	0.78	0.89	0.10149
BiP - WT							BiP - A322D
	Rep1	Rep2	Rep3	Average	SD			Rep1	Rep2	Rep3	Average	SD
NT	1.04	0.98	0.96	0.99333	0.04163		NT	1.08	0.89	1.02	0.99667	0.09713
SERPINH1 si-1	0.9	0.95	1.2	1.01667	0.16073		SERPINH1 si-1	0.8	0.96	1.22	0.99333	0.21197
SERPINH1 si-2	0.85	0.9	1.24	0.99667	0.21221		SERPINH1 si-2	0.96	0.82	1.04	0.94	0.11136
ATF6-N - WT							ATF6-N - A322D
	Rep1	Rep2	Rep3	Average	SD			Rep1	Rep2	Rep3	Average	SD
NT	1.12	0.87	1.02	1.00333	0.12583		NT	1.09	0.84	1.06	0.99667	0.1365
SERPINH1 si-1	0.9	0.85	0.85	0.86667	0.02887		SERPINH1 si-1	0.9	1.22	0.8	0.97333	0.21939
SERPINH1 si-2	0.95	1.2	0.87	1.00667	0.17214		SERPINH1 si-2	1.12	0.95	1.04	1.03667	0.08505
XBP1s - WT							XBP1s - A322D
	Rep1	Rep2	Rep3	Average	SD			Rep1	Rep2	Rep3	Average	SD
NT	1.1	0.82	1.14	1.02	0.17436		NT	1.15	0.87	1.02	1.01333	0.14012
SERPINH1 si-1	0.9	1.2	1.15	1.08333	0.16073		SERPINH1 si-1	0.72	0.85	0.94	0.83667	0.1106
SERPINH1 si-2	1.21	1.2	0.87	1.09333	0.19348		SERPINH1 si-2	1.04	0.95	0.89	0.96	0.0755
CHOP - WT							CHOP - A322D
	Rep1	Rep2	Rep3	Average	SD			Rep1	Rep2	Rep3	Average	SD
NT	1.08	0.84	1.14	1.02	0.15875		NT	1.18	0.82	1.02	1.00667	0.18037
SERPINH1 si-1	0.9	1.05	0.92	0.95667	0.08145		SERPINH1 si-1	1.32	0.85	1.15	1.10667	0.23798
SERPINH1 si-2	0.6	0.79	0.87	0.75333	0.13868		SERPINH1 si-2	0.72	0.85	0.89	0.82	0.08888

## Sheet: Figure 6B
Normalized protein band intensity
Hsp47 - WT							Hsp47 - A322D
	Rep1	Rep2	Rep3	Average	SD			Rep1	Rep2	Rep3	Average	SD
(-) SERPINH1 cDNA	1.15	0.95	0.98	1.02667	0.10786		(-) SERPINH1 cDNA	0.85	0.95	1.22	1.00667	0.1914
(+) SERPINH1 cDNA	2.8	3.05	3.85	3.23333	0.54848		(+) SERPINH1 cDNA	3.5	3.05	4.22	3.59	0.59017
Tg	1.05	1.15	1.52	1.24	0.24759		Tg	0.95	1.45	1.78	1.39333	0.41789
a1 - WT							a1 - A322D
	Rep1	Rep2	Rep3	Average	SD			Rep1	Rep2	Rep3	Average	SD
(-) SERPINH1 cDNA	1.16	0.92	0.87	0.98333	0.15503		(-) SERPINH1 cDNA	1.08	0.89	1.02	0.99667	0.09713
(+) SERPINH1 cDNA	1.5	1.26	1.4	1.38667	0.12055		(+) SERPINH1 cDNA	1.81	1.48	1.72	1.67	0.17059
Tg	0.52	0.67	0.82	0.67	0.15		Tg	0.38	0.71	0.48	0.52333	0.16921
BiP - WT							BiP - A322D
	Rep1	Rep2	Rep3	Average	SD			Rep1	Rep2	Rep3	Average	SD
(-) SERPINH1 cDNA	1.15	0.87	1.02	1.01333	0.14012		(-) SERPINH1 cDNA	1.18	0.82	1.02	1.00667	0.18037
(+) SERPINH1 cDNA	1.05	0.92	1.1	1.02333	0.09292		(+) SERPINH1 cDNA	0.76	0.86	1.19	0.93667	0.22502
Tg	2.2	1.89	1.78	1.95667	0.21779		Tg	2.62	2.22	1.64	2.16	0.49275
ATF6-N - WT							ATF6-N - A322D
	Rep1	Rep2	Rep3	Average	SD			Rep1	Rep2	Rep3	Average	SD
(-) SERPINH1 cDNA	1.18	0.84	1.02	1.01333	0.1701		(-) SERPINH1 cDNA	1.08	0.89	1.02	0.99667	0.09713
(+) SERPINH1 cDNA	0.62	0.92	0.86	0.8	0.15875		(+) SERPINH1 cDNA	0.82	0.86	0.92	0.86667	0.05033
Tg	3.24	2.21	2.41	2.62	0.54617		Tg	3.62	3.05	3.22	3.29667	0.29263
XBP1s - WT							XBP1s - A322D
	Rep1	Rep2	Rep3	Average	SD			Rep1	Rep2	Rep3	Average	SD
(-) SERPINH1 cDNA	1.2	1.05	0.82	1.02333	0.1914		(-) SERPINH1 cDNA	0.85	0.95	1.16	0.98667	0.15822
(+) SERPINH1 cDNA	1.1	1.04	0.86	1	0.1249		(+) SERPINH1 cDNA	0.9	0.82	1.06	0.92667	0.1222
Tg	12.5	15.7	20.2	16.1333	3.86825		Tg	20.6	18.4	16.8	18.6	1.90788
CHOP - WT							CHOP - A322D
	Rep1	Rep2	Rep3	Average	SD			Rep1	Rep2	Rep3	Average	SD
(-) SERPINH1 cDNA	1.15	1.02	0.82	0.99667	0.16623		(-) SERPINH1 cDNA	0.89	1.02	1.05	0.98667	0.08505
(+) SERPINH1 cDNA	1.1	0.98	0.82	0.96667	0.14048		(+) SERPINH1 cDNA	0.85	0.92	1.22	0.99667	0.19655
Tg	22	16.2	18.6	18.9333	2.91433		Tg	19.2	18.6	20.4	19.4	0.91652

## Sheet: Figure 6C
Normalized protein band intensity
Hsp47
	Rep1	Rep2	Rep3	Average	SD
NT	1.06687	0.9848	0.94833	1	0.06071
SERPINH1 si	0.21337	0.29544	0.33191	0.28024	0.06071
a1
	Rep1	Rep2	Rep3	Average	SD
NT	1.14447	0.90428	0.95125	1	0.1273
SERPINH1 si	0.31045	0.56065	0.51368	0.46159	0.13298
b2/3
	Rep1	Rep2	Rep3	Average	SD
NT	1.17302	0.84679	0.98019	1	0.16401
SERPINH1 si	0.23806	0.58429	0.45089	0.42441	0.17462
g2
	Rep1	Rep2	Rep3	Average	SD
NT	1.21226	1.02575	0.73199	0.99	0.24212
SERPINH1 si	0.12123	0.30773	0.57149	0.33348	0.22624
BiP
	Rep1	Rep2	Rep3	Average	SD
NT	1.00567	0.9371	1.05724	1	0.06027
SERPINH1 si	1.03595	1.12452	1.00438	1.05495	0.06228
ATF6-N
	Rep1	Rep2	Rep3	Average	SD
NT	1.06003	1.03138	0.89859	0.99667	0.08613
SERPINH1 si	0.84802	0.87667	0.99945	0.90805	0.08044
XBP1s
	Rep1	Rep2	Rep3	Average	SD
NT	0.94833	0.95745	1.09422	1	0.08173
SERPINH1 si	1.04316	1.03404	0.87726	0.98482	0.09326

## Sheet: Figure 6D
Normalized protein band intensity
Hsp47							Hsp47
	Rep1	Rep2	Rep3	Average	SD			Rep1	Rep2	Rep3	Average	SD
EV	1.1	0.92	0.98	1	0.09165		DMSO	0.85	0.95	1.22	1.00667	0.1914
ATF6-N cDNA	0.92	1.12	0.85	0.96333	0.14012		AA147	1.1	0.9	1.48	1.16	0.29462
XBP1s cDNA	0.9	1.15	1.32	1.12333	0.21127		AA263	1.15	1.45	1.32	1.30667	0.15044
a1							a1
	Rep1	Rep2	Rep3	Average	SD			Rep1	Rep2	Rep3	Average	SD
EV	1.05	0.92	1.08	1.01667	0.08505		DMSO	0.92	0.95	1.15	1.00667	0.12503
ATF6-N cDNA	2.21	1.62	2.42	2.08333	0.41477		AA147	3.05	2.52	2.22	2.59667	0.42028
XBP1s cDNA	1.49	1.92	1.82	1.74333	0.22502		AA263	2.52	1.85	1.63	2	0.46357
BiP							BiP
	Rep1	Rep2	Rep3	Average	SD			Rep1	Rep2	Rep3	Average	SD
EV	1.21	0.83	0.92	0.98667	0.19858		DMSO	1.14	0.83	1.02	0.99667	0.15631
ATF6-N cDNA	2.42	1.69	2.3	2.13667	0.39145		AA147	1.78	1.69	2.14	1.87	0.23812
XBP1s cDNA	1.42	1.22	0.92	1.18667	0.25166		AA263	1.42	1.52	1.84	1.59333	0.21939
ATF6-N							ATF6-N
	Rep1	Rep2	Rep3	Average	SD			Rep1	Rep2	Rep3	Average	SD
EV	1.25	0.8	0.92	0.99	0.23302		DMSO	1.09	0.83	1.05	0.99	0.14
ATF6-N cDNA	15.24	12.33	16.5	14.69	2.13871		AA147	1.68	2.06	1.94	1.89333	0.19425
XBP1s cDNA	1.42	1.85	1.22	1.49667	0.32192		AA263	1.32	1.52	1.24	1.36	0.14422
XBP1s							XBP1s
	Rep1	Rep2	Rep3	Average	SD			Rep1	Rep2	Rep3	Average	SD
EV	1.32	0.82	0.9	1.01333	0.26858		DMSO	0.85	0.92	1.15	0.97333	0.15695
ATF6-N cDNA	1.26	0.92	1.22	1.13333	0.18583		AA147	1.1	0.9	1.24	1.08	0.17088
XBP1s cDNA	10.25	11.45	15.4	12.3667	2.69459		AA263	1.2	1.45	1.28	1.31	0.12767
