# Supplementary material for: Hsp47 promotes biogenesis of multi-subunit neuroreceptors in the endoplasmic reticulum
Source: eLife journal article supplement (doi:10.7554/elife.84798), 2024-07-04

Figure 7

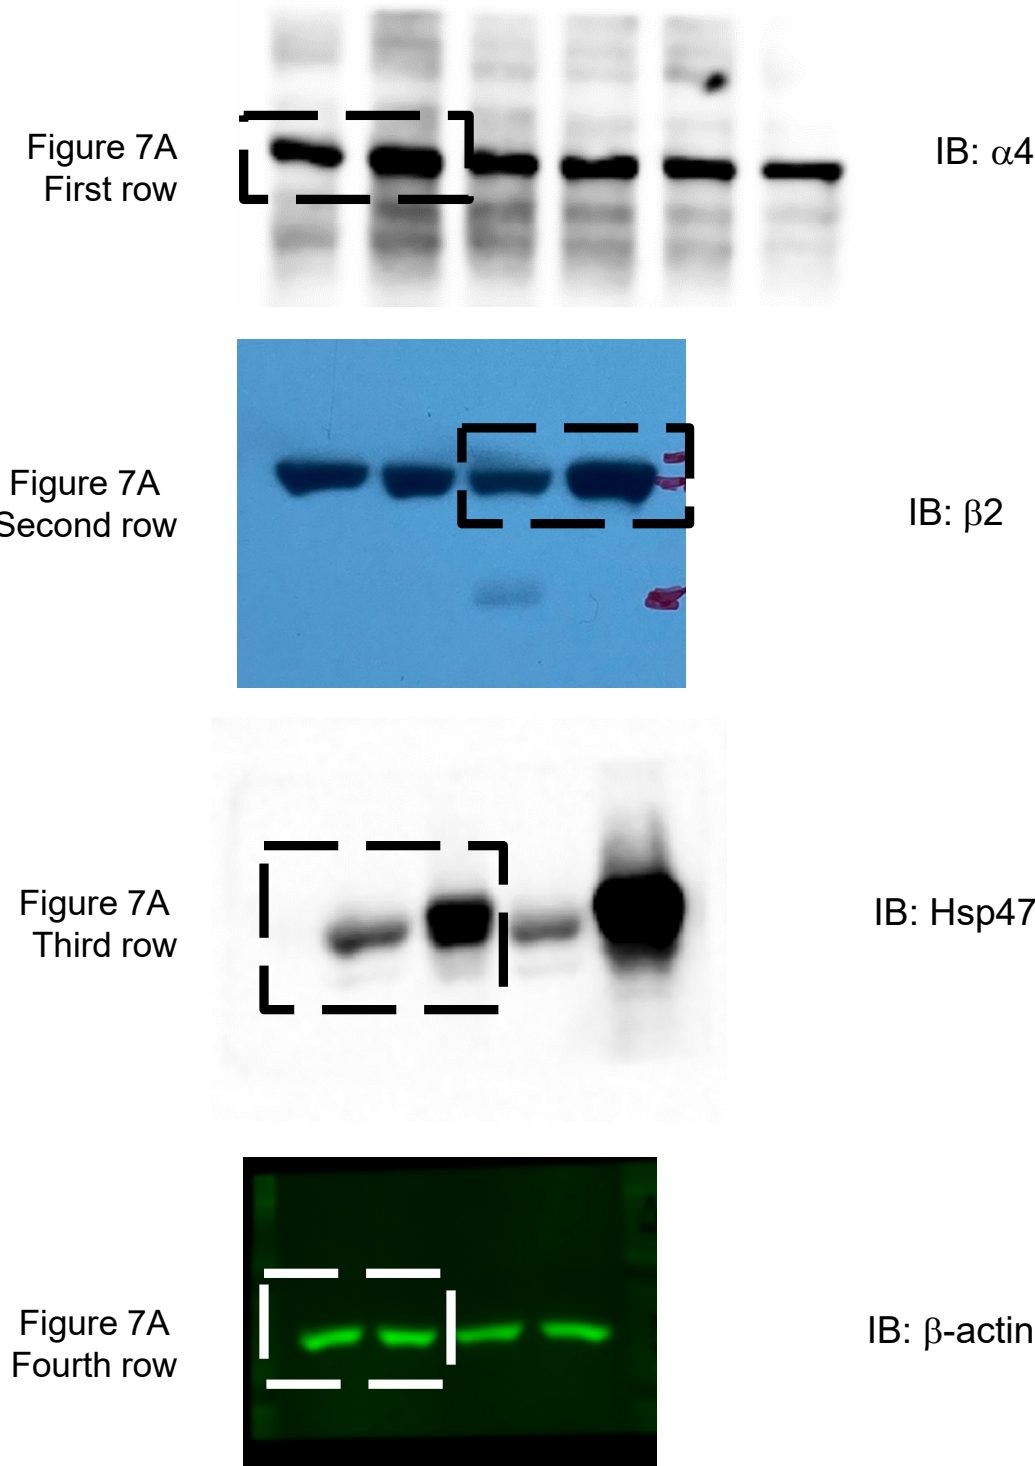

Figure 7

Figure 7D

First row

IB: 5-HT<sub>3</sub>A

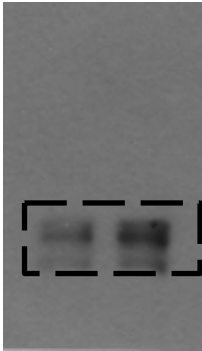

Figure 7D

Fourth row

IB: 5-HT<sub>3</sub>A

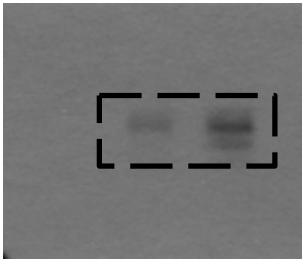

Figure 7D

Second row

IB: Flag

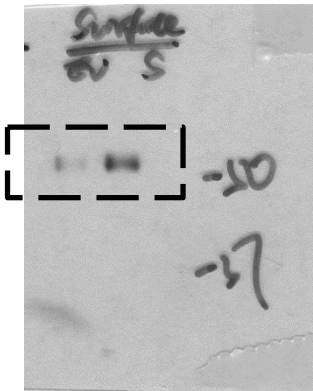

Figure 7D

Fifth row

IB: Flag

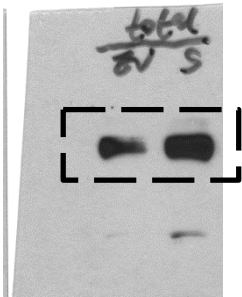

Figure 7D

Third row

IB: ATPase

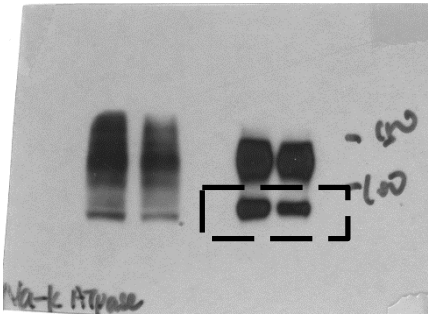

Figure 7D

Sixth row

IB: Hsp47

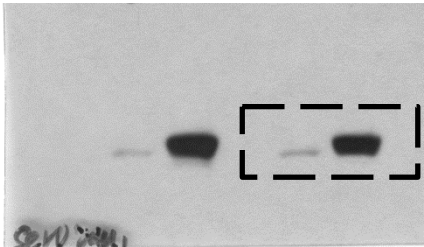

Figure 7D

Seventh row

IB:  $\beta$ -actin

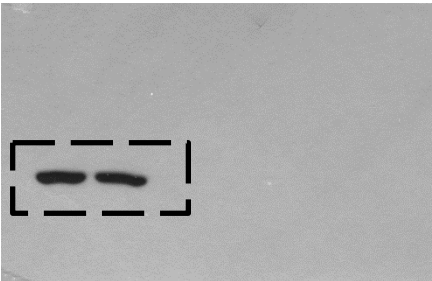

Supplement: fig7-data2 [file elife-84798-fig7-data2-v2.zip]
