# Supplementary material for: Hsp47 promotes biogenesis of multi-subunit neuroreceptors in the endoplasmic reticulum
Source: eLife journal article supplement (doi:10.7554/elife.84798), 2024-07-04
Supplement: fig7-data3 [file Figure 7-source data 13.xlsx]

## Sheet: Figure 7A
Normalized a4 intensity
	Rep1	Rep2	Rep3	Average	SD
EV	1.11	0.98	0.92	1.00333	0.09713
SERPINH1	3.1	2	4.2	3.1	1.1
Normalized b2 intensity
	Rep1	Rep2	Rep3	Average	SD
EV	1.2	0.85	0.9	0.98333	0.1893
SERPINH1	2.5	2.8	3.6	2.96667	0.56862
Normalized Hsp47 intensity
	Rep1	Rep2	Rep3	Average	SD
EV	1.3	0.8	1.1	1.06667	0.25166
SERPINH1	15.2	10.6	20.2	15.3333	4.80139

## Sheet: Figure 7B
FRET: a4b2 nAChR
EV	SERPINH1
0.768	67.473
1.432	58.575
6.397	30.149
16.351	52.302
31.313	64.901
29.142	62.539
1.112	49.047
0.336	13.404
5.047	44.937
3.128	9.949
9.056	5.827
32.892	6.145
22.205	6.596
26.561	3.319
25.712	0.895
9.157	13.145
13.345	6.542
0.437	38.99
39.845	2.59
34.63	5.801
15.266	16.153
26.193	49.272
25.606	51.582
5.521	52.072
14.547	51.623
42.187	53.067
51.817	51.489
50.236	52.275
45.198	52.537
40.882	51.049
50.679	49.012
49.083	50.964
51.278	53.336
50.989	48.094
48.377	60.475
43.845	53.745
43.038	53.272
38.944	65.597
33.625	67.234
39.851	65.993
35.781	66.937
33.683	37.166
21.141	47.902
19.606	57.813
26.896	50.696
17.923	55.305
15.771	20.113
18.38	45.604
17.265	55.189
22.6	53.253
20.984	48.128
12.144	33.506
18.171	33.45
17.694	25.609
22.155	27.476
33.102	24.64
22.728	48.089
53.382	45.524
42.562	38.403
55.992	45.916
45.537	44.305
58.631	46.903
36.783	41.839
	45.79
	30.341
	38.579

## Sheet: Figure 7C
Peak current amplitude
EV	SERPINH1
45	68
58	53
35	50
40	100
38	267
45	110
90	101
120	212.5
50	240

## Sheet: Figure 7D
Normalized protein band intensity
Surface 5HT3A							Surface 5HT3B
	Rep1	Rep2	Rep3	Average	SD			Rep1	Rep2	Rep3	Average	SD
EV	0.66871	1.46479	0.8665	1	0.41449		EV	0.88209	1.39118	0.72673	1	0.34756
SERPINH1	5.48342	4.67734	5.28563	5.1488	0.4201		SERPINH1	3.98704	3.52794	4.14239	3.88579	0.31949
Total 5HT3A							Total 5HT3B							Total Hsp47
	Rep1	Rep2	Rep3	Average	SD			Rep1	Rep2	Rep3	Average	SD			Rep1	Rep2	Rep3	Average	SD
EV	0.80778	1.27085	0.92137	1	0.24135		EV	0.88757	1.15552	0.95691	1	0.13907		EV	0.70223	0.51342	1.78435	1	0.6858
SERPINH1	2.14061	1.71753	2.02701	1.96172	0.21897		SERPINH1	2.17455	1.88603	2.10521	2.05526	0.15061		SERPINH1	10.1823	10.3711	9.06019	9.8712	0.70868
