# Supplementary material for: Hsp47 promotes biogenesis of multi-subunit neuroreceptors in the endoplasmic reticulum
Source: eLife journal article supplement (doi:10.7554/elife.84798), 2024-07-04

Figure 7-figure supplement 1

Figure 7-figure supplement 1B  
Top panel  
IB:  $\alpha 7$

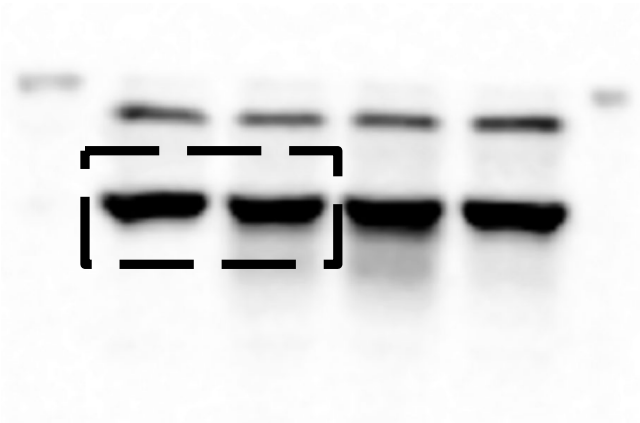

Figure 7-figure supplement 1B  
Middle panel  
IB: Hsp47

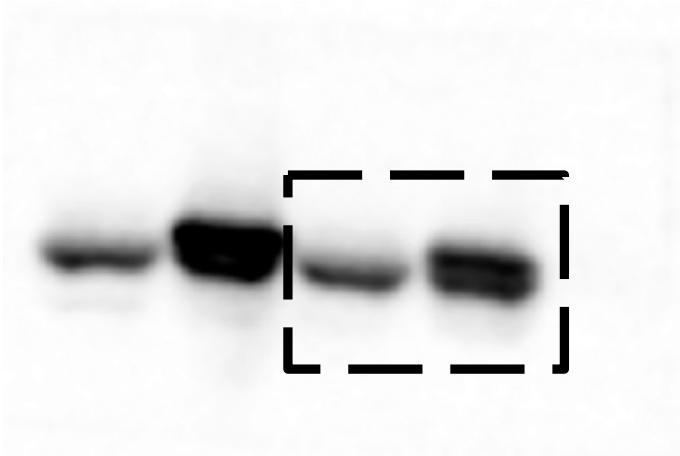

Figure 7-figure supplement 1B  
Bottom panel  
IB:  $\beta$ -actin

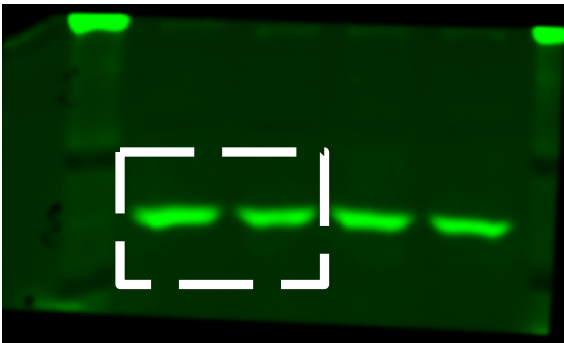

Supplement: fig7-figsupp1-data2 [file Figure 7-figure supplement 1-source data 4.pdf › Figure 7-figure supplement 1-source data 4/Figure 7-figure supplement 1-source data 4.pdf]
