# Supplementary material for: Hsp47 promotes biogenesis of multi-subunit neuroreceptors in the endoplasmic reticulum
Source: eLife journal article supplement (doi:10.7554/elife.84798), 2024-07-04
Supplement: fig7-figsupp1-data3 [file Figure 7-figure supplement 1-source data 5.xlsx]

## Sheet: Figure 7-figure supplement  1A
FRET a7 nAChR
EV	SERPINH1
38.328	5.158
15.498	30.44
18.128	10.176
5.854	1.355
1.98	31.835
40.818	29.645
5.609	48.304
17.952	26.585
45.187	10.31
26.437	16.97
30.878	7.972
6.411	9.567
5.714	5.875
48.863	5.684
44.868	8.805
11.315	10.947
8.101	2.973
2.688	9.833
6.341	23.981
40.4	56.091
11.939	13.746
39.214	48.086
38.79	42.409
12.113	28.263
19.796	15.528
33.92	51.523
29.293	57.282
25.038	27.964
19.612	38.041
48.313	27.17
53.495	34.508
20.435	2.21
18.172	9.61
18.997	9.512
32.974	8.036
31.805	1.628
0.097	2.214
0.17	41.406
3.042	21.038
1.568	3.992
0.528	4.005
0.686	6.601
7.407	11.061
4.263	9.657
31.424	27.877
0.677	27.915
1.023	14.326
0.431	16.195
4.429	33.146
2.283	57.085
10.931	0.683
32.356	0.153
47.395	4.971
27.362	0.5
43.763	8.91
8.394	0.202
0.854	5.402
33.773	0.538
36.277	4.892
9.239	27.632
10.446	20.273
60.109	4.587
56.32	2.246
2.135	0.117
16.779	4.277
12.7	12.143
8.414	25.498
1.734	10.237
3.583	0.688
2.028	0.861
10.912	6.608
5.642	37.333
1.355	49.458
4.258	28.85
0.509	20.442
4.11	12.788
1.462	36.269
31.497	3.839
1.031	37.952
13.644	23.563
0.89	27.776
4.283	16.164
35.893	11.358
21.879	55.991
45.115	40.146
38.235	15.688
29.046	47.535
4.413	44.366
23.999	12.491
25.249	23.011
10.356	24.443
12.181
8.327
13.438
19.408
16.093
10.575
2.362
19.376
2.988
19.759
7.887
4.996
17.655

## Sheet: Figure 7-figure supplement 1B
Normalized a7 intensity
	Rep1	Rep2	Rep3	Average	SD
EV	1.25	1.01	0.85	1.03667	0.20133
SERPINH1	1.18	1.3	1.02	1.16667	0.14048
Normalized Hsp47 intensity
	Rep1	Rep2	Rep3	Average	SD
EV	1.2	0.75	1.1	1.01667	0.23629
SERPINH1	7.2	9.5	11.5	9.4	2.15174
