# Supplementary material for: Hsp47 promotes biogenesis of multi-subunit neuroreceptors in the endoplasmic reticulum
Source: eLife journal article supplement (doi:10.7554/elife.84798), 2024-07-04
Supplement: fig7-figsupp2-data2 [file Figure 7-figure supplement 2-source data 12.pdf › Figure 7-figure supplement 2-source data 12/Figure 7-figure supplement 2-source data 12.pdf]

## Figure 7-figure supplement 2

Figure 7-figure supplement 2A  
First row  
IB: GluN2A

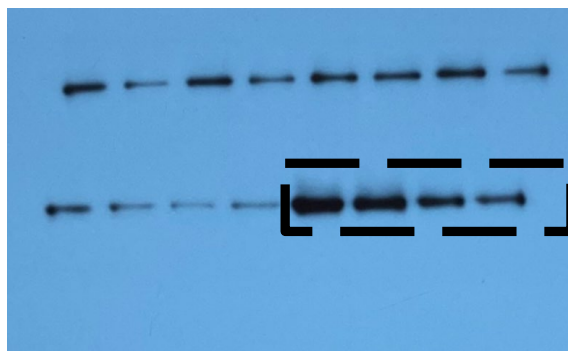

Figure 7-figure supplement 2A  
Second row  
IB: ATPase

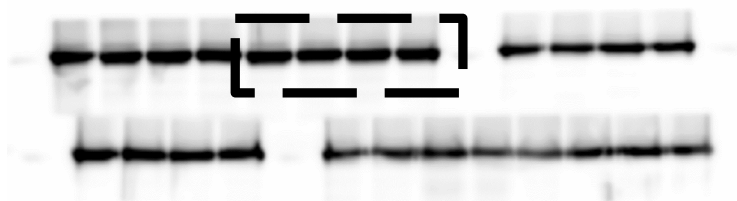

Figure 7-figure supplement 2A  
Third row  
IB: GluN2A

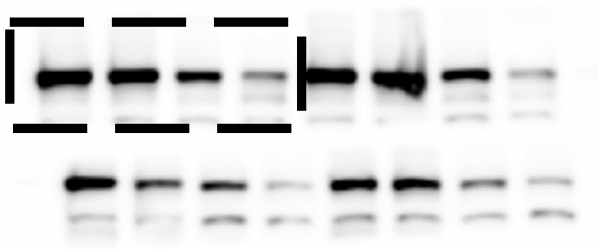

Figure 7-figure supplement 2A  
Fourth row  
IB: Hsp47

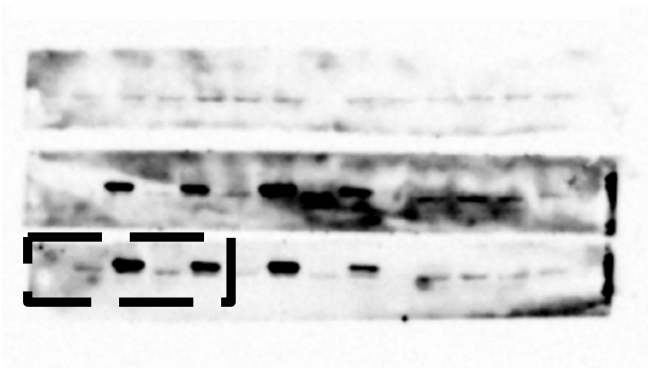

Figure 7-figure supplement 2A  
Fifth row  
IB:  $\beta$ -actin

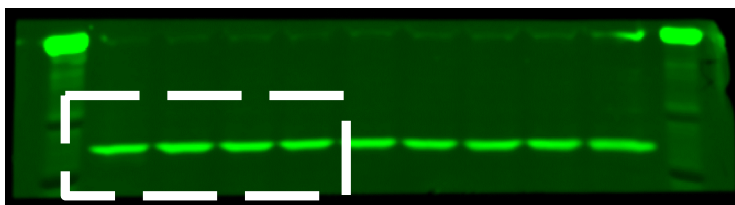

Figure 7-figure supplement 2

Figure 7-figure supplement 2B  
Top panel

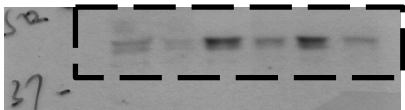

IB: Hsp47

Figure 7-figure supplement 2B  
Middle panel

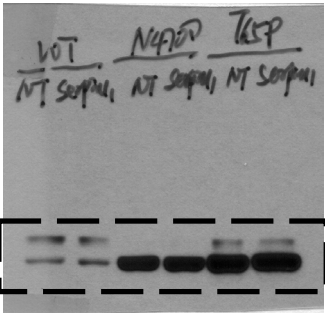

IB: Flag

Figure 7-figure supplement 2B  
Bottom panel

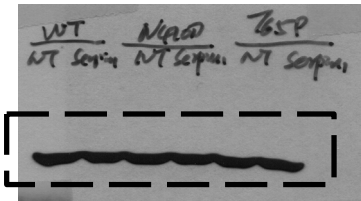

IB:  $\beta$ -actin

Figure 7-figure supplement 2C  
Top panel

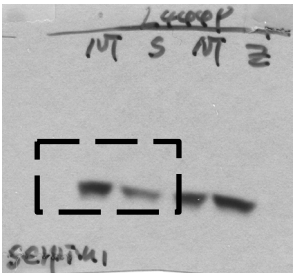

IB: Hsp47

Figure 7-figure supplement 2C  
Middle panel

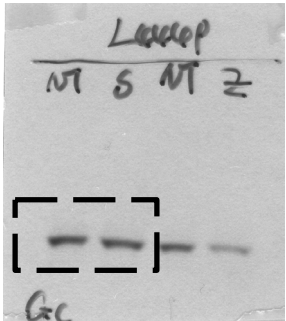

IB: GC

Figure 7-figure supplement 2C  
Bottom panel

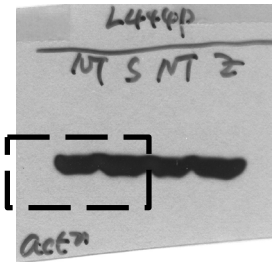

IB:  $\beta$ -actin
