# Supplementary material for: Hsp47 promotes biogenesis of multi-subunit neuroreceptors in the endoplasmic reticulum
Source: eLife journal article supplement (doi:10.7554/elife.84798), 2024-07-04
Supplement: fig7-figsupp2-data3 [file Figure 7-figure supplement 2-source data 13.xlsx]

## Sheet: Figure 7-figure supplement 2A
Normalized protein band intensity
Surface GluN2A - WT							Surface GluN2A - M705V
	Rep1	Rep2	Rep3	Average	SD			Rep1	Rep2	Rep3	Average	SD
EV	1.15237	0.88067	1.09439	1.04248	0.14309		EV	1.01856	0.90329	1.07847	1.00011	0.08903
SERPINH1 cDNA	0.58771	0.8194	0.64569	0.68427	0.12057		SERPINH1 cDNA	0.26482	0.36008	0.20491	0.27661	0.07826
Total GluN2A - WT							Total GluN2A - M705V
	Rep1	Rep2	Rep3	Average	SD			Rep1	Rep2	Rep3	Average	SD
EV	1.03767	0.89307	1.04926	0.99333	0.08703		EV	0.95044	1.04651	1.00306	1	0.04811
SERPINH1 cDNA	0.84051	0.96511	0.82892	0.87818	0.07551		SERPINH1 cDNA	0.49898	0.41029	0.44636	0.45188	0.0446
Total Hsp47 - WT							Total Hsp47 - M705V
	Rep1	Rep2	Rep3	Average	SD			Rep1	Rep2	Rep3	Average	SD
EV	1.15	1.2	0.8	1.05	0.21794		EV	0.92	1.07	1.00306	0.99769	0.07514
SERPINH1 cDNA	19.2	15.6	11.85	15.55	3.67526		SERPINH1 cDNA	8.5	12.5	14.8	11.9333	3.188

## Sheet: Figure 7-figure supplement  2B
Normalized protein band intensity
Hsp47 - WT							Hsp47 - N470D							Hsp47 - T65P
	Rep1	Rep2	Rep3	Average	SD			Rep1	Rep2	Rep3	Average	SD			Rep1	Rep2	Rep3	Average	SD
NT	1.03686	0.87361	1.06952	0.99333	0.10496		NT	0.93224	0.96602	1.10174	1	0.08971		NT	1.05332	0.95379	0.99288	1	0.05014
SERPINH1 si	0.32143	0.46468	0.28877	0.35829	0.09357		SERPINH1 si	0.40086	0.36709	0.22137	0.32977	0.09539		SERPINH1 si	0.153	0.25752	0.21843	0.20965	0.05281
Mature hERG- WT							Mature hERG- N470D							Mature hERG- T65P
	Rep1	Rep2	Rep3	Average	SD			Rep1	Rep2	Rep3	Average	SD			Rep1	Rep2	Rep3	Average	SD
NT	1.01069	0.88306	1.09625	0.99667	0.10728		NT	ND	ND	ND	ND	NA		NT	0.98721	0.86742	1.14538	1	0.13942
SERPINH1 si	1.06122	1.19884	0.96066	1.07358	0.11957		SERPINH1 si	ND	ND	ND	ND	NA		SERPINH1 si	1.08593	1.20571	0.90775	1.06646	0.14993
Immature hERG - WT							Immature hERG - N470D							Immature hERG - T65P
	Rep1	Rep2	Rep3	Average	SD			Rep1	Rep2	Rep3	Average	SD			Rep1	Rep2	Rep3	Average	SD
NT	0.97319	0.90188	1.12493	1	0.11391		NT	1.01331	0.91771	1.06898	1	0.07651		NT	0.80156	1.13429	1.05415	0.99667	0.17365
SERPINH1 si	1.11917	1.19048	0.94744	1.0857	0.12493		SERPINH1 si	0.93224	1.03784	0.87657	0.94888	0.08191		SERPINH1 si	1.12807	0.80535	0.88549	0.93963	0.16804

## Sheet: Figure 7-figure supplement  2C
Normalized Hsp47 intensity							Normalized GC intensity
	Rep1	Rep2	Rep3	Average	SD			Rep1	Rep2	Rep3	Average	SD
NT	0.94176	1.09615	0.96209	1	0.08389		NT	0.96924	0.89822	1.13254	1	0.12015
SERPINH1 si	0.39554	0.23515	0.37521	0.3353	0.08733		SERPINH1 si	1.11463	1.18565	0.92913	1.07647	0.13245
