# Supplementary figures and images for: Hsp47 promotes biogenesis of multi-subunit neuroreceptors in the endoplasmic reticulum
Source: eLife journal article supplement (doi:10.7554/elife.84798), 2024-07-04

Figure 1—figure supplement 2A

Top row

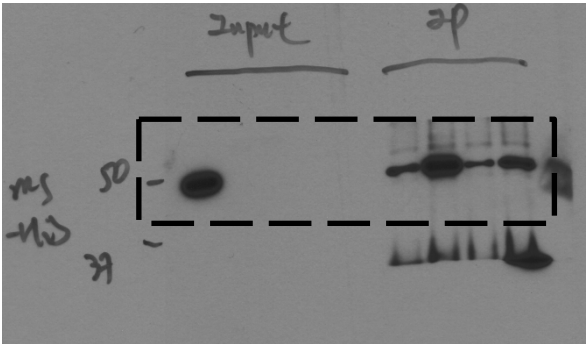

IB: His  
(Hsp47)

3rd row

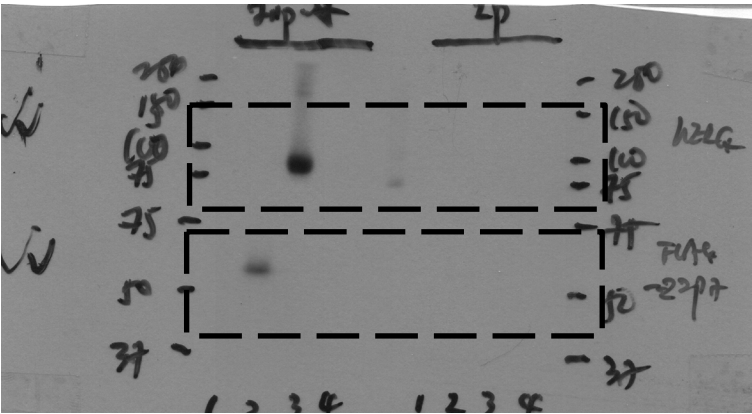

IB: hERG

2nd row



IB: FLAG  
(ZIP7)

Bottom row

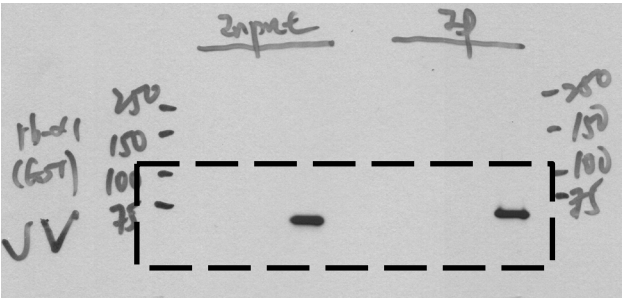

IB:  $\alpha 1$

Supplement: fig1-figsupp2-data2 [file Figure 1-figure supplement 2-source data 4.pdf › Figure 1-figure supplement 2-source data 4/Figure 1-figure supplement 2-source data 4.pdf]

Figure 2—figure supplement 1A

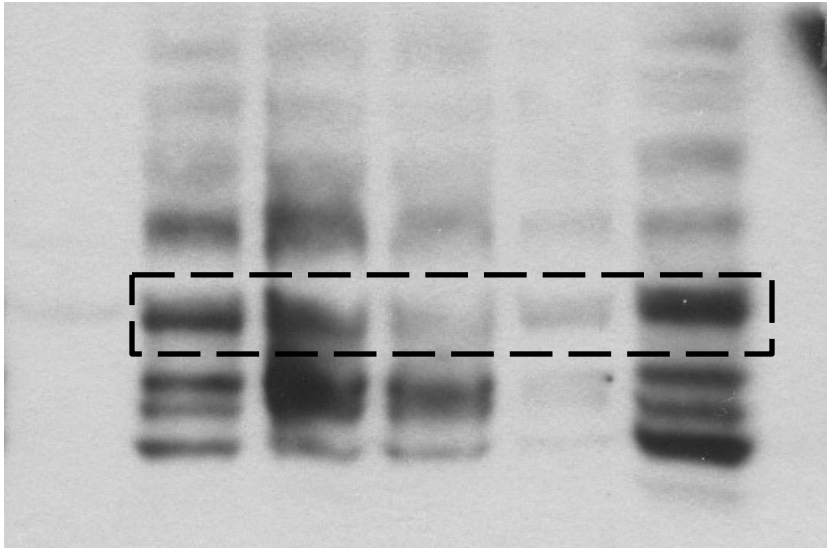

Top panel

IB:  $\beta$ 2/3

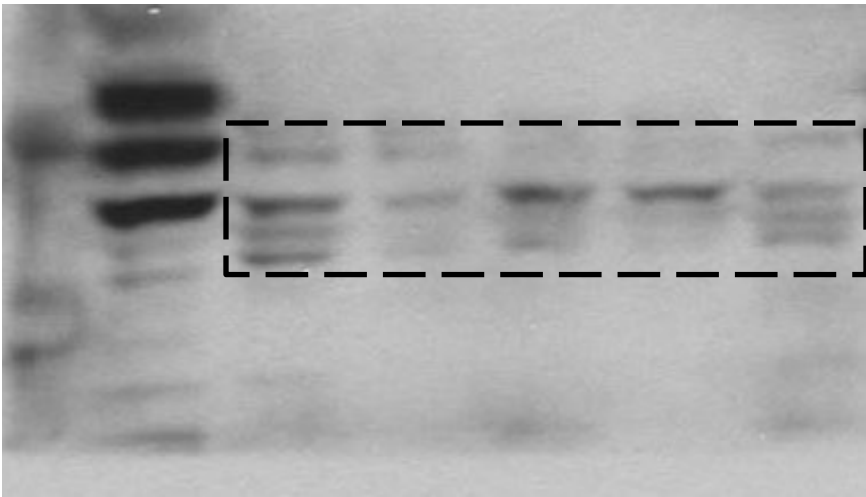

Middle panel

IB: Hsp47

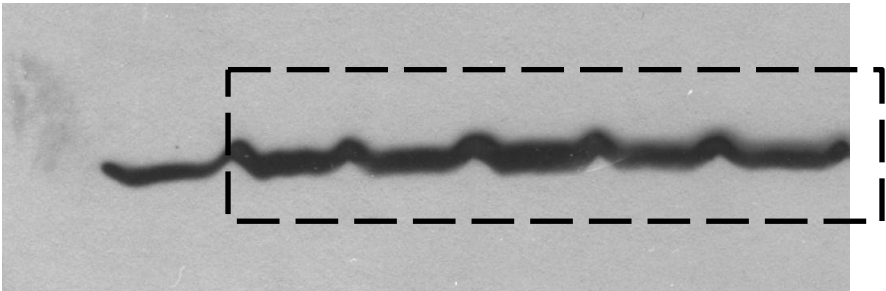

Bottom panel

IB:  $\beta$ -actin

Supplement: fig2-figsupp1-data2 [file Figure 2-figure supplement 1-source data 4.pdf › Figure 2-figure supplement 1-source data 4/Figure 2-figure supplement 1-source data 4.pdf]

Figure 5—figure supplement 2

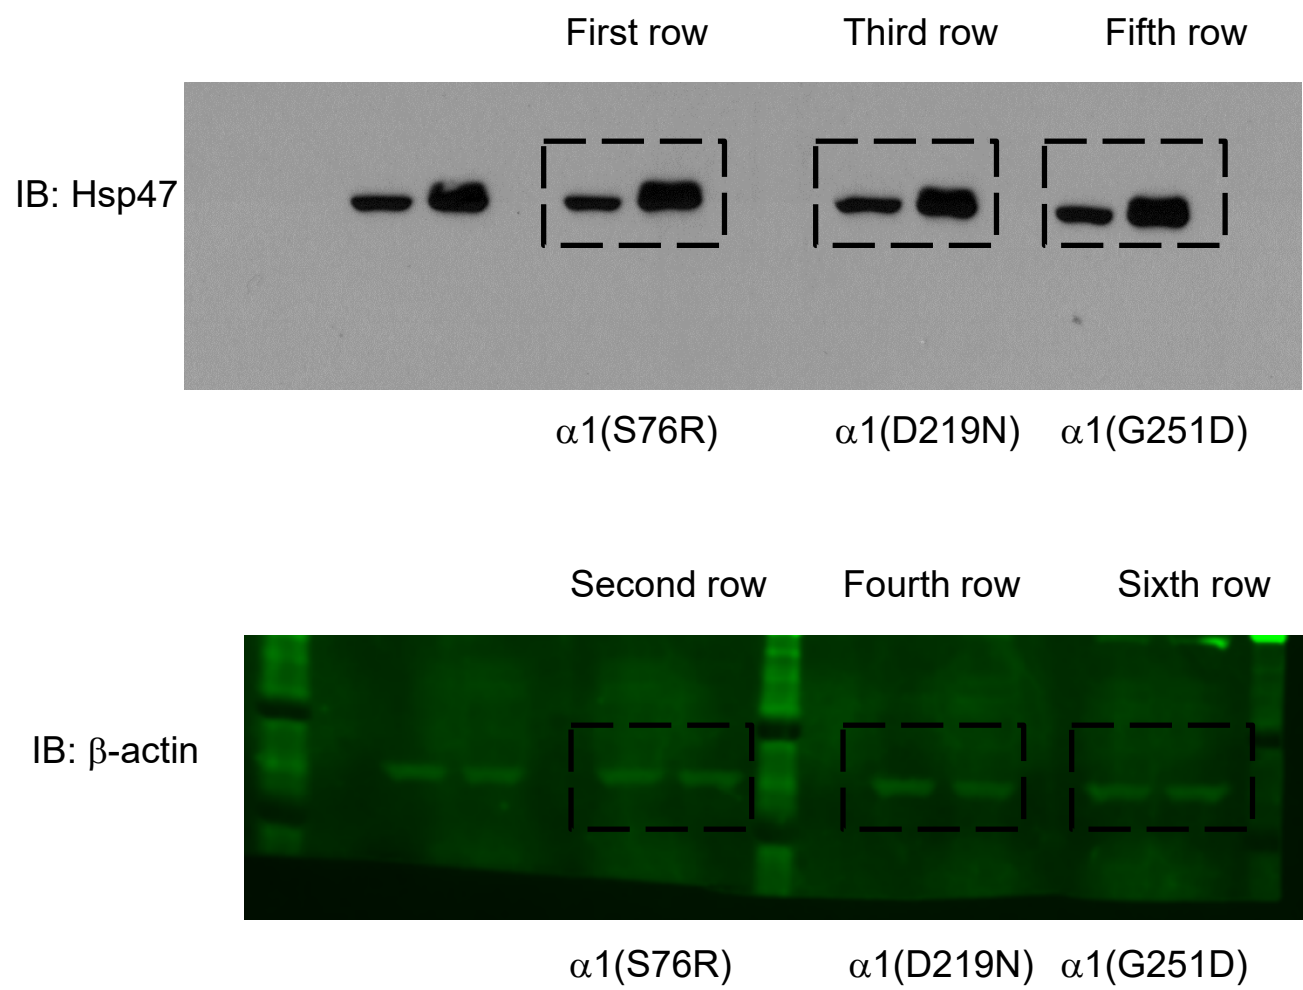

Supplement: fig5-figsupp2-data2 [file Figure 5-figure supplement 2-source data 3.pdf › Figure 5-figure supplement 2-source data 3/Figure 5-figure supplement 2-source data 3.pdf]
